# Supplementary material for: Simultaneous Synthesis of Vitamins D2, D4, D5, D6, and D7 from Commercially Available Phytosterol, β-Sitosterol, and Identification of Each Vitamin D by HSQC NMR
Source: PubMed Central journal article supplement (PMC6630616; doi:10.3390/metabo9060107), 2019-06-06
Supplement: metabolites-09-00107-s001.pdf [file metabolites-09-00107-s001.pdf]

## Supplementary Materials

### Simultaneous Synthesis of Vitamins D<sub>2</sub>, D<sub>4</sub>, D<sub>5</sub>, D<sub>6</sub>, and D<sub>7</sub> from Commercially Available Phytosterol, $\beta$ -Sitosterol, and Identification of Each Vitamin D by HSQC NMR

Shiro Komba \*, Eiichi Kotake-Nara and Wakako Tsuzuki

Food Component Analysis Unit, Food Research Institute, National Agriculture and Food Research Organization, 2-1-12, Kannondai, Tsukuba, Ibaraki 305-8642, Japan; ekotake@affrc.go.jp (E.K.-N.); wakako@affrc.go.jp (W.T.)

\*Correspondence: skomba@affrc.go.jp; Tel.: +81-29-838-7298

**Figure S1.** Synthesis of vitamin D<sub>3</sub>. S2

The experimental details on the synthesis of vitamin D<sub>3</sub> (**13**).

S2–S3

NMR spectra of vitamin D<sub>2</sub> (**9**) S4–S7

NMR spectra of vitamin D<sub>3</sub> (**13**) S8–S11

NMR spectra of vitamin D<sub>4</sub> (**10**) S12–S15

NMR spectra of vitamin D<sub>5</sub> (**6**) S16–S19

NMR spectra of vitamin D<sub>6</sub> (**8**) S20–S23

NMR spectra of vitamin D<sub>7</sub> (**7**) S24–S27

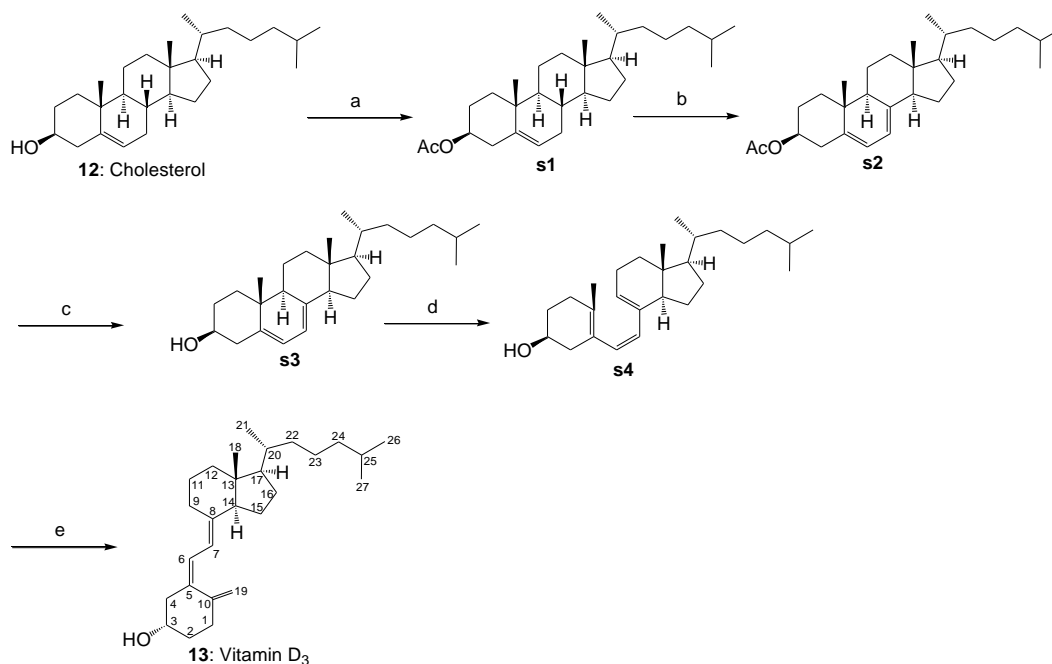

**Figure S1.** Synthesis of vitamin D<sub>3</sub>. (a) Ac<sub>2</sub>O, pyridine, 45 °C, 15 h, 98%. (b) 1) *N*-bromosuccinimide (NBS), cyclohexane, reflux, 1 h, 2) 1.0 M Bu<sub>4</sub>NF/THF, room temperature, 12 h, 39%. (c) 28% NaOMe in MeOH, CH<sub>2</sub>Cl<sub>2</sub>/MeOH, room temp, 2 h, 62%. (d) 0.1% 3-*tert*-butyl-4-hydroxyanisole (BHA) in cyclohexane, 280 nm, 9.03 mW/cm<sup>2</sup>, room temp, 1 h, 25%. (e) 0.1% BHA in cyclohexane, reflux, 1 h, 41%.

*The experimental details on the synthesis of vitamin D<sub>3</sub> (13).*

Cholesterol **12** (3.0 g, 7.76 mmol) was dissolved in pyridine (20 mL), acetic anhydride (5.0 mL, 52.9 mmol) was added, and the mixture was stirred at 45 °C for 15 h. After ice was added, the mixture was stirred for 1 h, extracted with chloroform, washed with 2N aq. HCl, concentrated, and then the product was crystallized with ethanol to obtain compound **s1** (3.25 g, 98%). Compound **s1** (3.0 g, 7.00 mmol) was dissolved in cyclohexane (80 mL) at 65 °C, *N*-bromosuccinimide (NBS; 1.868 g, 10.49 mmol) was added and then stirred under reflux conditions (90 °C) for 1 h. After cooling the reaction to room temperature, water (100 mL) was added and then stirred for 1 h. The mixture was extracted with *n*-hexane, washed with water, concentrated and dried in vacuo. To the resulting mixture, a 1.0 M solution of tetrabutylammonium fluoride in THF (10.5 mL) was added and stirred at room temperature for 12 h. The reaction product was extracted using *n*-hexane, washed with water, concentrated, and then the main product was separated with silica-gel column chromatography (ethyl acetate/*n*-hexane 1:10) to obtain compound **s2** (1.17 g, 39%). Compound **s2** (1.12 g, 2.62 mmol)

was dissolved in dichloromethane (8 mL) and methanol (30 mL), 28% NaOMe in MeOH was added until pH 10 and then stirred for 2 h. After the reaction mixture was concentrated, the main product was separated with silica-gel column chromatography (ethyl acetate/*n*-hexane 1:4) to obtain compound **s3** (0.625 g, 62%). Compound **s3** (20 mg, 0.052 mmol) was dissolved in 0.1% 3-*tert*-butyl-4-hydroxyanisole (BHA) in cyclohexane (2 mL) and transferred to a petri dish. While stirring the mixture in a petri dish covered with a polyvinylidene chloride food wrap, the mixture was irradiated with UV at 280 nm (9.03 mW/cm<sup>2</sup>) for 1 h. After the reaction mixture was concentrated, the main product was separated using silica-gel column chromatography (ethyl acetate/*n*-hexane 1:4) to obtain compound **s4** (5.02 mg, 25%). Compound **s4** (5.02 mg, 0.013 mmol) was dissolved in 0.1% BHA in cyclohexane (2 mL) and the mixture was stirred under reflux conditions (100 °C) for 1 h. After the reaction mixture was concentrated, the main product was separated using silica-gel column chromatography (ethyl acetate/*n*-hexane 1:4) to obtain the vitamin D<sub>3</sub> (**13**: 2.08 mg, 41%). Vitamin D<sub>3</sub> (**13**); <sup>1</sup>H-NMR (400 MHz, CDCl<sub>3</sub>),  $\delta$  = 0.54 (s, 3H, Me-18), 0.86 (d, 3H, *J* = 6.6 Hz, Me-26 or Me-27), 0.87 (d, 3H, *J* = 6.6 Hz, Me-26 or Me-27), 0.92 (d, 3H, *J* = 6.4 Hz, Me-21), 1.01 (m, 1H, H-22a), 1.08 – 1.18 (m, 3H, H-23a, H-24a, H-24b), 1.23 – 1.41 (m, 6H, H-12a, H-16a, H-17, H-20, H-22b, H-23b), 1.43 – 1.58 (m, 4H, H-11a, H-15a, H-15b, H-25), 1.63 – 1.73 (m, 3H, H-2a, H-9a, H-11b), 1.81 – 2.03 (m, 4H, H-2b, H-12b, H-14, H-16b), 2.18 (m, 1H, H-1a), 2.28 (dd, 1H, *J* = 12.9, 7.3 Hz, H-4a), 2.40 (m, 1H, H-1b), 2.57 (dd, 1H, *J* = 12.9, 3.2 Hz, H-4b), 2.82 (m, 1H, H-9b), 3.95 (m, 1H, H-3), 4.82 (broad d, 1H, H-19a), 5.05 (m, 1H, H-19b), 6.03 (d, 1H, *J* = 11.2 Hz, H-7), 6.23 (d, 1H, *J* = 11.2 Hz, H-6); <sup>13</sup>C-NMR (100 MHz, CDCl<sub>3</sub>),  $\delta$  = 12.0 (C-18), 18.8 (C-21), 22.3 (C-15), 22.5 (C-26 or C-27), 22.8 (C-26 or C-27), 23.6 (C-11), 23.9 (C-23), 27.6 (C-16), 28.0 (C-25), 29.0 (C-9), 31.9 (C-1), 35.2 (C-2), 36.1 (C-20 and C-22), 39.5 (C-24), 40.5 (C-12), 45.86 (C-4 or C-13), 45.93 (C-4 or C-13), 56.4 (C-14), 56.6 (C-17), 69.2 (C-3), 112.4 (C-19), 117.5 (C-7), 122.5 (C-6), 135.0 (C-5), 142.4 (C-8), 145.1 (C-10).

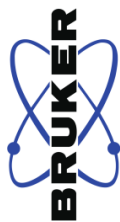

```

Current Data Parameters
NAME          sk65-85-4
EXPNO        20
PROCNO       1

F2 - Acquisition Parameters
Date_         20180227
Time_        11:57
INSTRUM      spect
PROBHD       5 mm CPBBO BB-
PULPROG      zg30
TD           65536
SOLVENT      CDCl3
DS           1
NS           2
SWH          8278.146 Hz
FIDRES      0.126314 Hz
AQ          3.9583745 sec
RG          32
DW          60.400 usec
DE          296.9
TE          29.9
D1          1.00000000 sec
TD0         1

===== CHANNEL f1 =====
NUC1         1H
P1          12.00 usec
PL1         0 dB
PL12        21.29127693 dB
SFO1        400.1324710 MHz

F2 - Processing parameters
SI          32768
SF          400.1300093 MHz
WDW         EM
SSB         0 Hz
LB          0
GB          0
PC          1.00
  
```

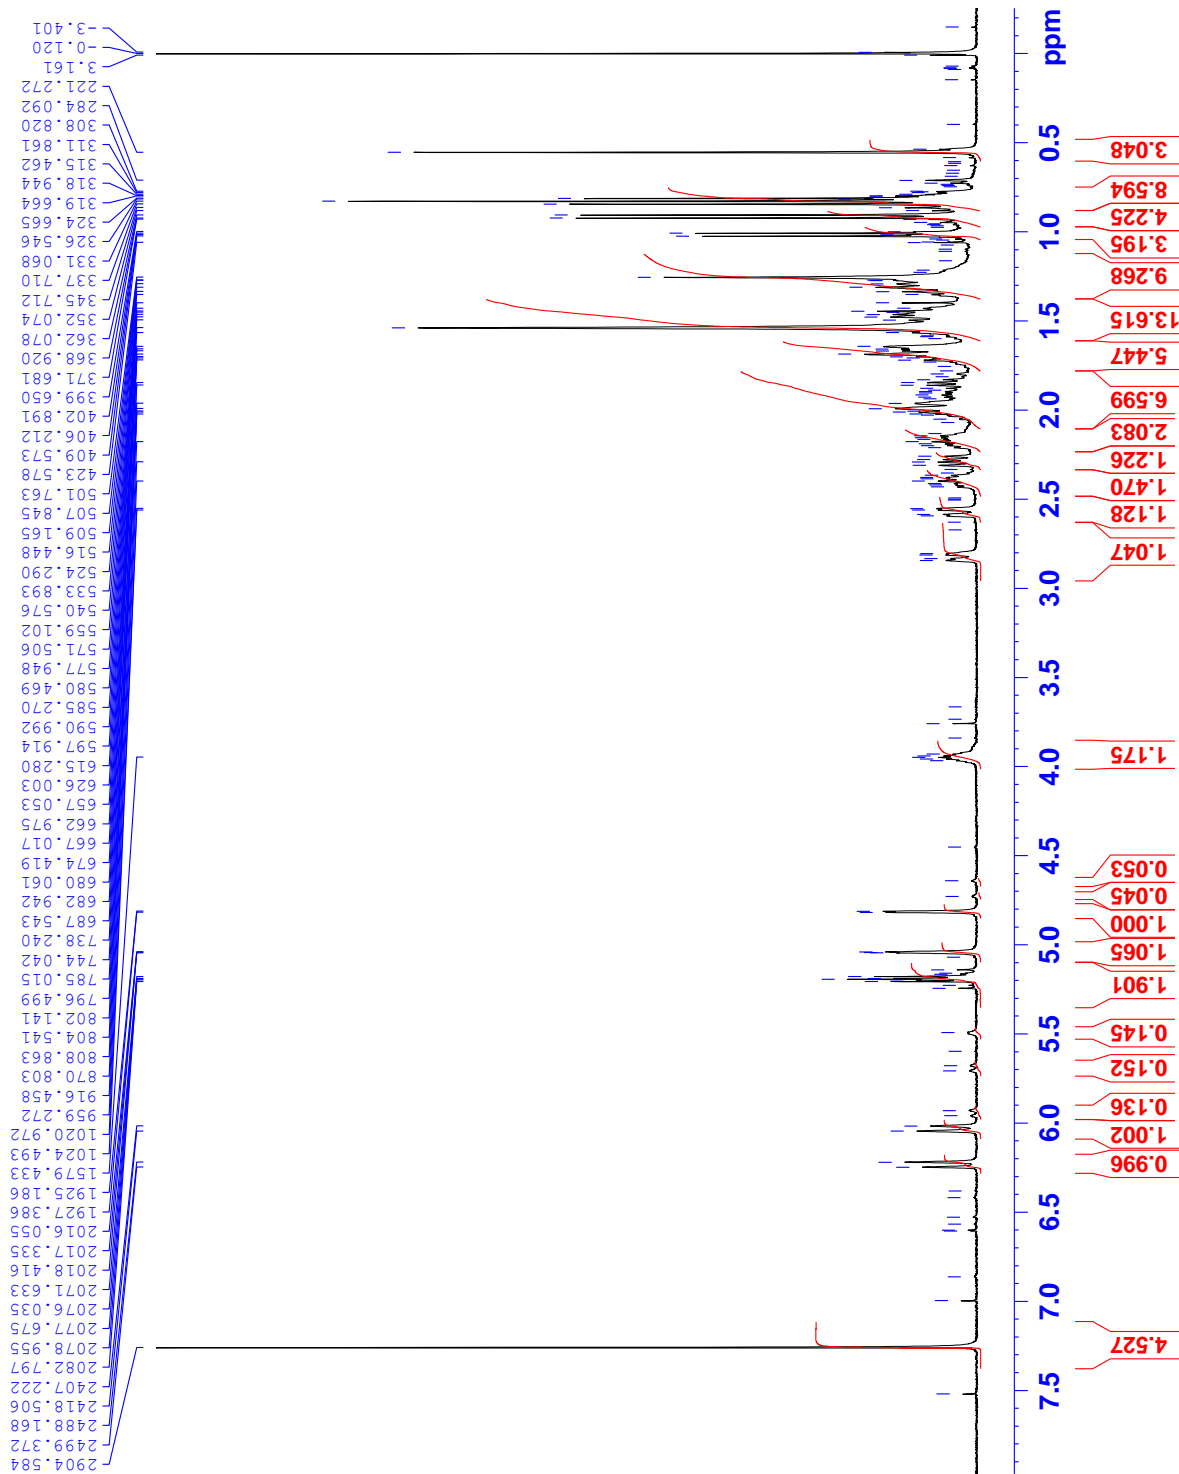

Figure S2. <sup>1</sup>H NMR spectrum of vitamin D<sub>2</sub> (9).

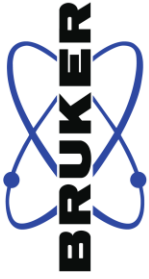

Current Data Parameters  
 NAME: sK65-85-4  
 EXPNO: 21  
 PROCNO: 1

?2 - Acquisition Parameters  
 Date\_ 20180227  
 Time 1:58

INSTRUM spect  
 PROBHD 5 mm CPBBO BB-  
 PULPROG cosygpcf  
 ZUGS 2048  
 SOLVENT CDCl3  
 NS 8  
 DS 8  
 SWH 5341.880 Hz  
 FIDRES 2.608340 Hz  
 AQ 0.1916928 sec  
 RG 512  
 JW 93.600 usec  
 FE 6.50 usec  
 DE 300.0 K  
 TO 0.00000300 sec  
 TI 1.48689198 sec  
 S13 0.00000400 sec  
 T16 0.00020000 sec  
 LNO 0.00018720 sec

CHANNEL f1  
 NUCL 1H  
 P0 12.00 usec  
 P1 12.00 usec  
 PL1 -3.60 dB  
 PL2W 21.29127693 W  
 P0L 400.1324057 MHz

GRADIENT CHANNEL  
 SPWAM[1] SINE.100  
 PZ1 10.00 %  
 P16 1000.00 usec

?1 - Acquisition parameters  
 CH 128  
 F0L 400.1324 MHz  
 FIDRES 41.733540 Hz  
 W 13.350 PPM  
 FMODE QF

?2 - Processing parameters  
 SI 1024  
 SF 400.1300061 MHz  
 SINE  
 VDW 0  
 SSB 0 Hz  
 GB 0 Hz  
 GC 1.40

?1 - Processing parameters  
 SI 1024  
 QF  
 SF 400.1300052 MHz  
 SINE  
 VDW 0 Hz  
 SSB 0 Hz

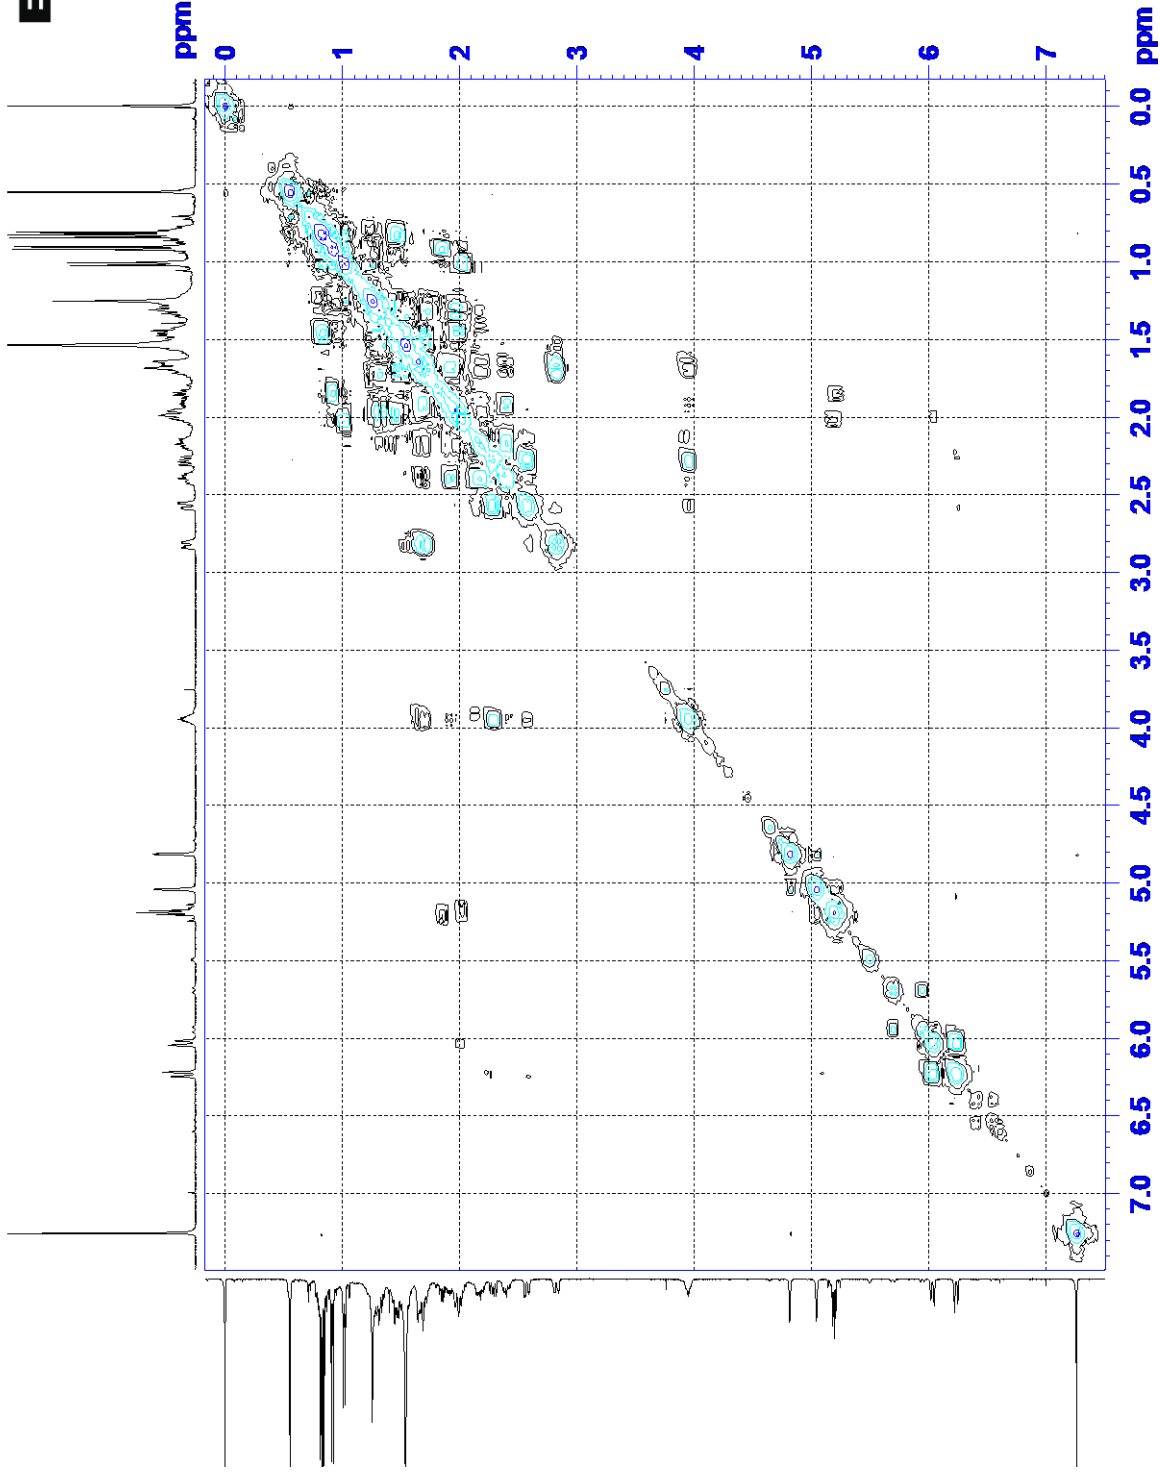

Figure S3. <sup>1</sup>H<sup>1</sup>H COSY NMR spectrum of vitamin D<sub>2</sub>(9).

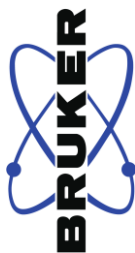

```

Current Data Parameters
NAME      sk65-85-4
EXPNO    22
PROCNO   1

F2 - Acquisition Parameters
Date_    20180227
Time     3.04
INSTRUM spect
PROBHD   5 mm CPBEO BB-
PULPROG zgpg30
TD       65536
SOLVENT  CDCl3
NS       1024
DS       4
SWH      23980.814 Hz
FIDRES   0.365918 Hz
AQ       1.3664256 sec
RG       4597.6
RW       20.850 usec
RE       16.00 usec
IE       300.0 K
C1       2.00000000 sec
C11      0.03000000 sec
TD0      1

===== CHANNEL f1 =====
NUC1     13C
P1       10.00 usec
PL1      -4.30 dB
PL1W     89.24295807 W
SFO1     100.6228298 MHz

===== CHANNEL f2 =====
CPDPRG12 waltz16
NUC2     1H
PCPD2    80.00 usec
PL2      -3.80 dB
PL12     12.00 dB
PL13     12.00 dB
PL2W     22.29470444 W
PL12W    0.58641046 W
PL13W    0.58641046 W
SFO2     400.1316005 MHz

F2 - Processing parameters
SI       32768
SF       100.6127690 MHz
AQDW     EM
SSB      0
LB       1.00 Hz
GB       0
PC       1.40
  
```

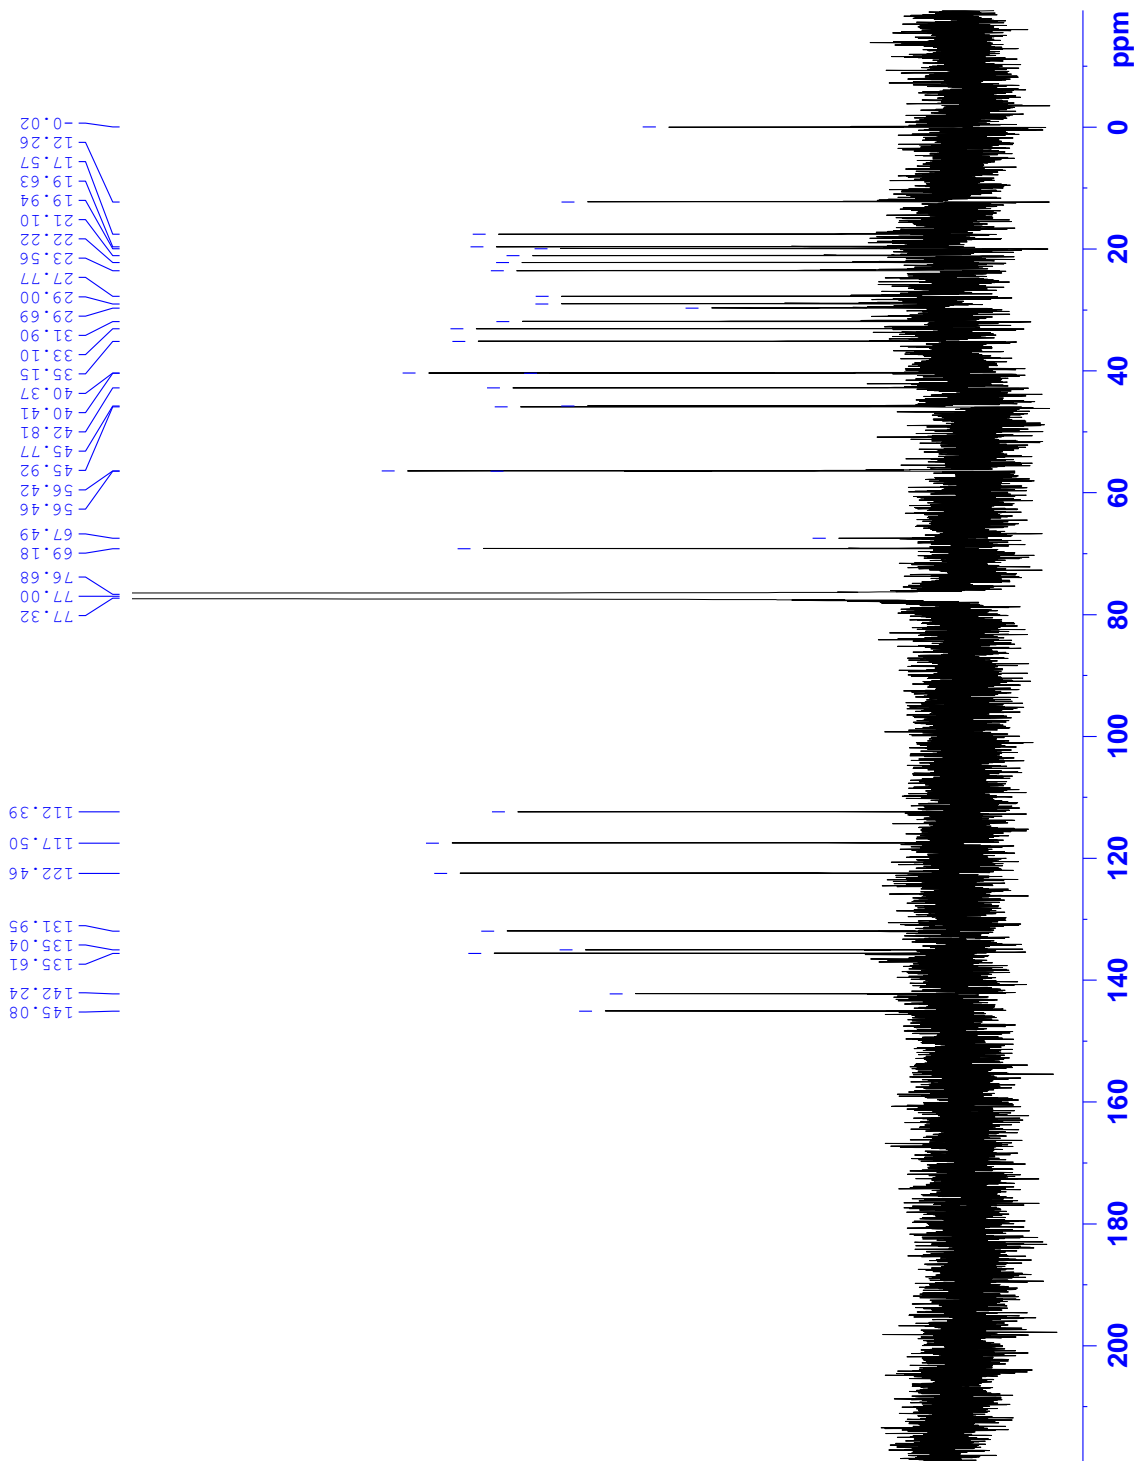

Figure S4. <sup>13</sup>C NMR spectrum of vitamin D<sub>2</sub> (9).

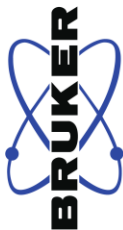

Current Data Parameters  
 NAME 3165-95-4  
 EXPNO 24  
 PROCNO 1

F2 - Acquisition Parameters

Date\_ 20180227  
 Time 3:23  
 INSTRUM spect  
 PROBRD 5 mm CPBBO BB-  
 PULPROG zgpg30  
 TD 4096  
 SOLVENT CDCl3  
 NS 8  
 DS 16  
 SWH 5341.800 Hz  
 FIDRES 0.1833856 Hz  
 AQ 4.6341  
 RG 93.600 usec  
 DE 6.50 usec  
 TE 300.0 K  
 CREST13 8.0000000  
 DD 0.0000300 sec  
 DA 0.0625000 sec  
 DI6 0.0002000 sec  
 INO 0.00002335 sec

==== CHANNEL F1 =====

NUC1 1H  
 P1 12.00 usec  
 PL1 2.00 dB  
 FL1 -3.50 dB  
 ELW 21.29127693 W  
 SF01 400.1324057 MHz

==== CHANNEL F2 =====

NUC2 13C  
 P2 10.00 usec  
 PL2 0.00 dB  
 ELW 89.24295807 W  
 SF02 100.6238138 MHz

==== GRADIENT CHANNEL =====

GENAM(1) SINE.100  
 GENAM(2) SINE.100  
 GENAM(3) SINE.100  
 GR21 30.00 %  
 GR22 30.00 %  
 GR23 40.10 %  
 PL6 1000.00 usec

F1 - Acquisition parameters

TD 128  
 SFO1 400.1324057 MHz  
 SF02 100.6238138 MHz  
 SW 222.085 Ppm  
 PRMODE OP

F2 - Processing parameters

SI 1024  
 SF 400.1300038 MHz  
 NWDW 0  
 NGB 0 Hz  
 GB 0  
 PC 1.40

F1 - Processing parameters

SI 1024  
 SF 100.6178949 MHz  
 NWDW 0  
 NGB 0 Hz  
 GB 0

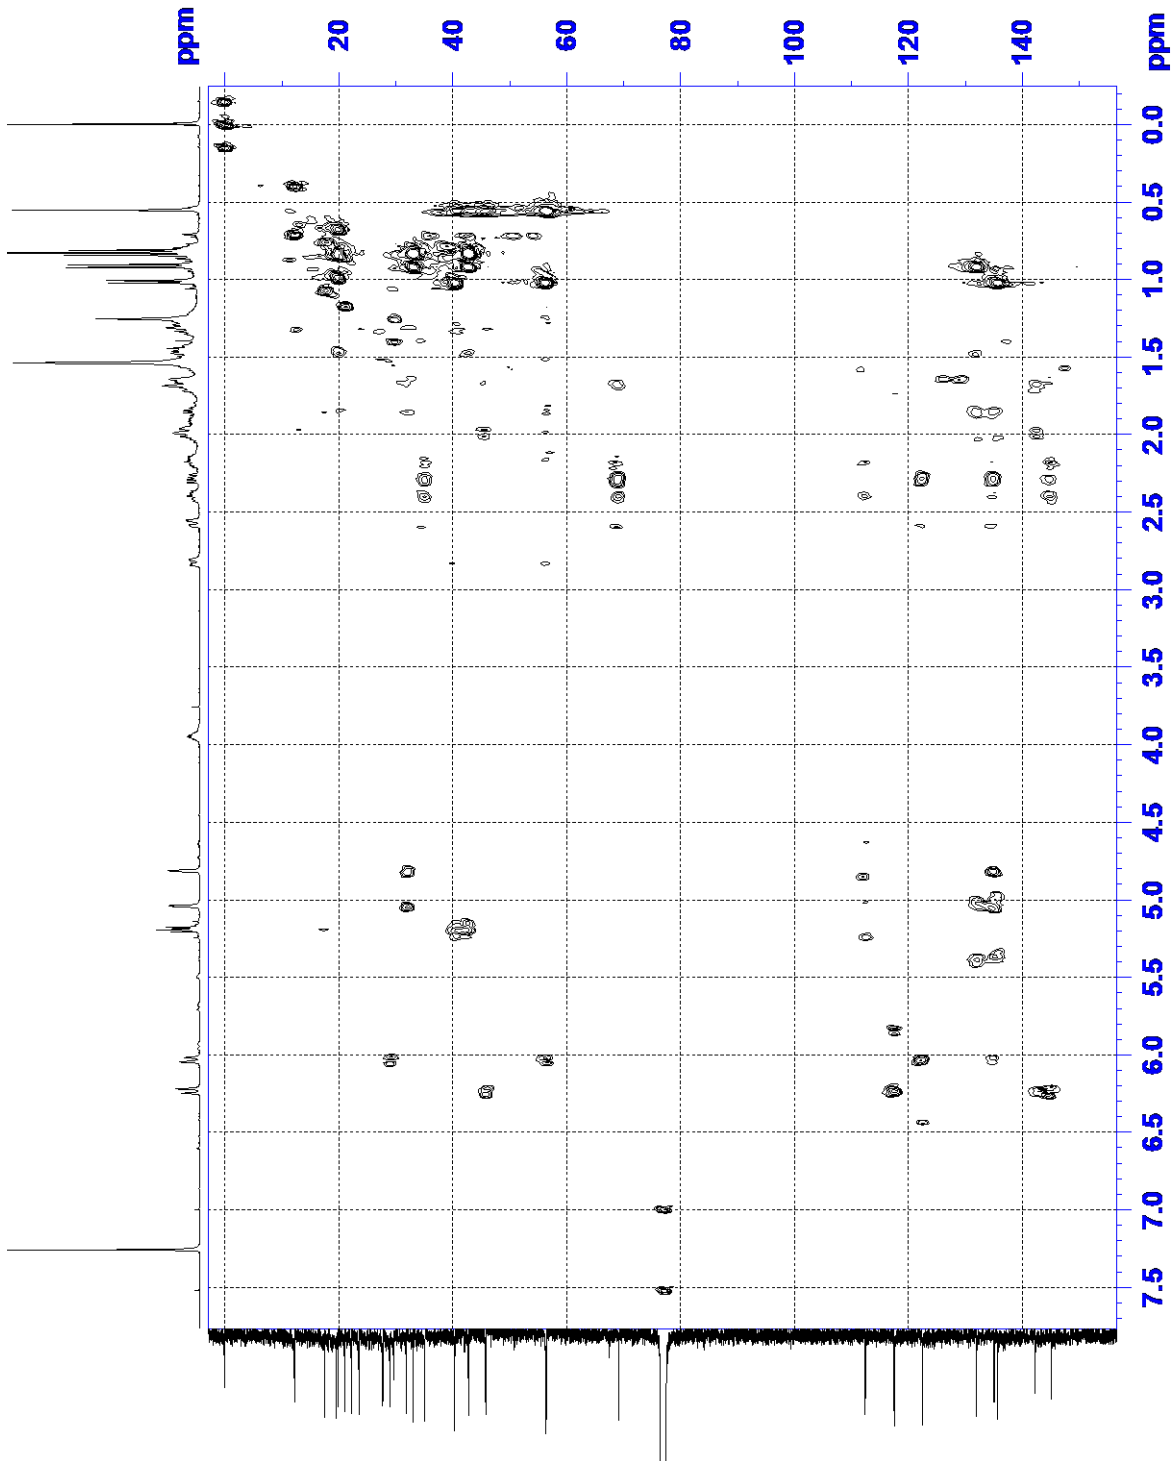

Figure S5. HMBC NMR spectrum of vitamin D<sub>2</sub> (9).

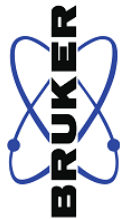

```

Current Data Parameters
NAME          ssk65-56
EXPNO         10
PROCNO        1
F2 - Acquisition Parameters
Date_         20110919
Time          19:09
INSTRUM       spect
PROBHD        5 mm CPBBO BB-
PULPROG       zg30
ID            65536
SOLVENT       CDCl3
NS            16
DS            1
SWH           8278.146 Hz
FIDRES       0.156314 Hz
AQ           3.9583745 sec
RG           25.4
DW           60.400 usec
DE           6.50 usec
TE           299.9 K
TD           1.000000001 sec
===== CHANNEL f1 =====
NUC1          1H
P1            12.00 usec
PL1          -3.60 dB
ELW          21.29127653 W
SFO1         400.1324710 MHz
F2 - Processing parameters
SI           32768
SF           400.1300091 MHz
WDW          EM
SSB          0
LB           0 Hz
GB           0
PC           1.00
  
```

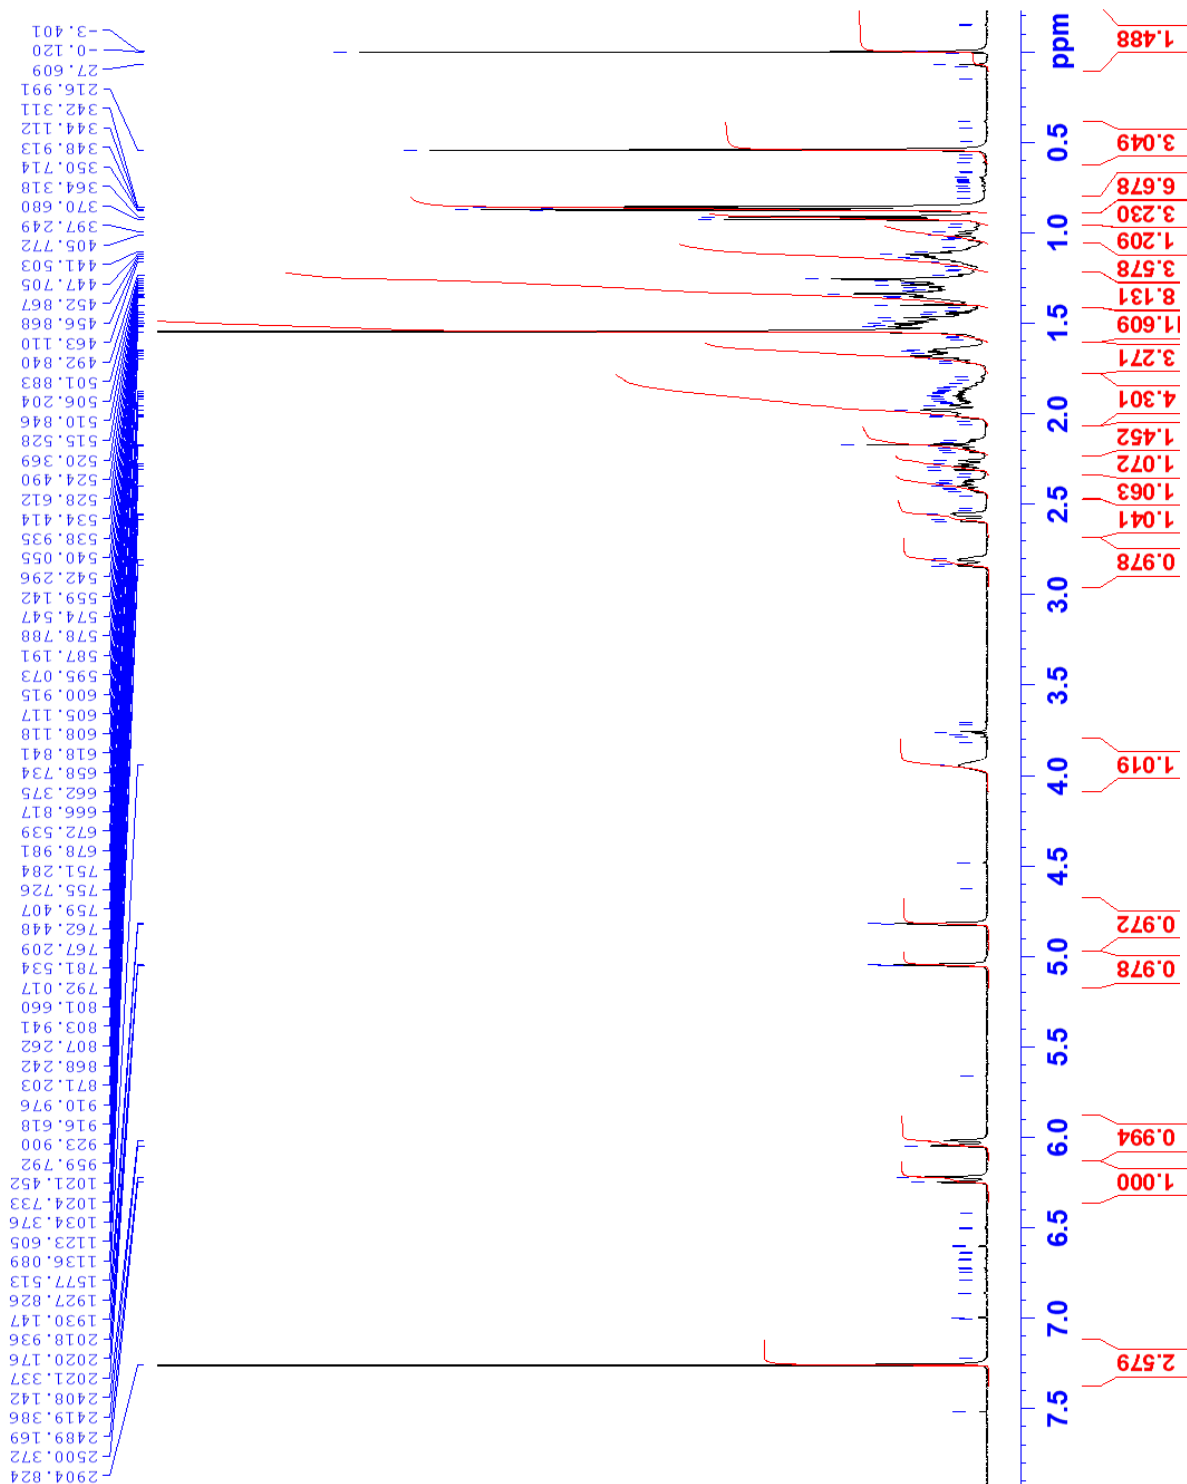

Figure S6. <sup>1</sup>H NMR spectrum of vitamin D<sub>3</sub> (13).



```

Current Data Parameters
NAME          SK65-56
EXPNO         11
PROCNO        1

P2 - Acquisition Parameters
Date_         20171101
Time          15:31
INSTRUM       spect
PROBHD        5 mm CPBBO BB-
PULPROG       cmgprf
PD            2048
SOLVENT       CDCl3
NS            1
DS            8
SWH           5341.880 Hz
FIDRES        2.608340 Hz
AQ            0.1916928 sec
RG            362
DM            93.600 usec
DE            6.50 usec
FE            300.0 K
DD            0.0000300 sec
D1            1.4685198 sec
D13           0.0000400 sec
D16           0.0026000 sec
RG0           0.00016720 sec

===== CHANNEL f1 =====
NUC1           1H
P0            12.00 usec
P1            12.00 usec
PL1           -3.60 dB
PL1W          21.29127693 W
SFO1           400.1324057 MHz

===== GRADIENT CHANNEL =====
SFO1M1         SINE.100
SFO1           10.00 %
P16           1000.00 usec

P1 - Acquisition parameters
PD            128
SFO1           400.1324 MHz
FIDRES        41.73350 Hz
PACMODE       13.350 Ppm
PACMODE       QF

P2 - Processing parameters
SI            1024
SF            400.1300000 MHz
WDW           SINE
SSB           0
GB            0
EB            0
PC            1.40

F1 - Processing parameters
SI            1024
AQ            0.1916928 sec
SF            400.1300000 MHz
WDW           SINE
SSB           0
GB            0
EB            0
PC            1.40

```

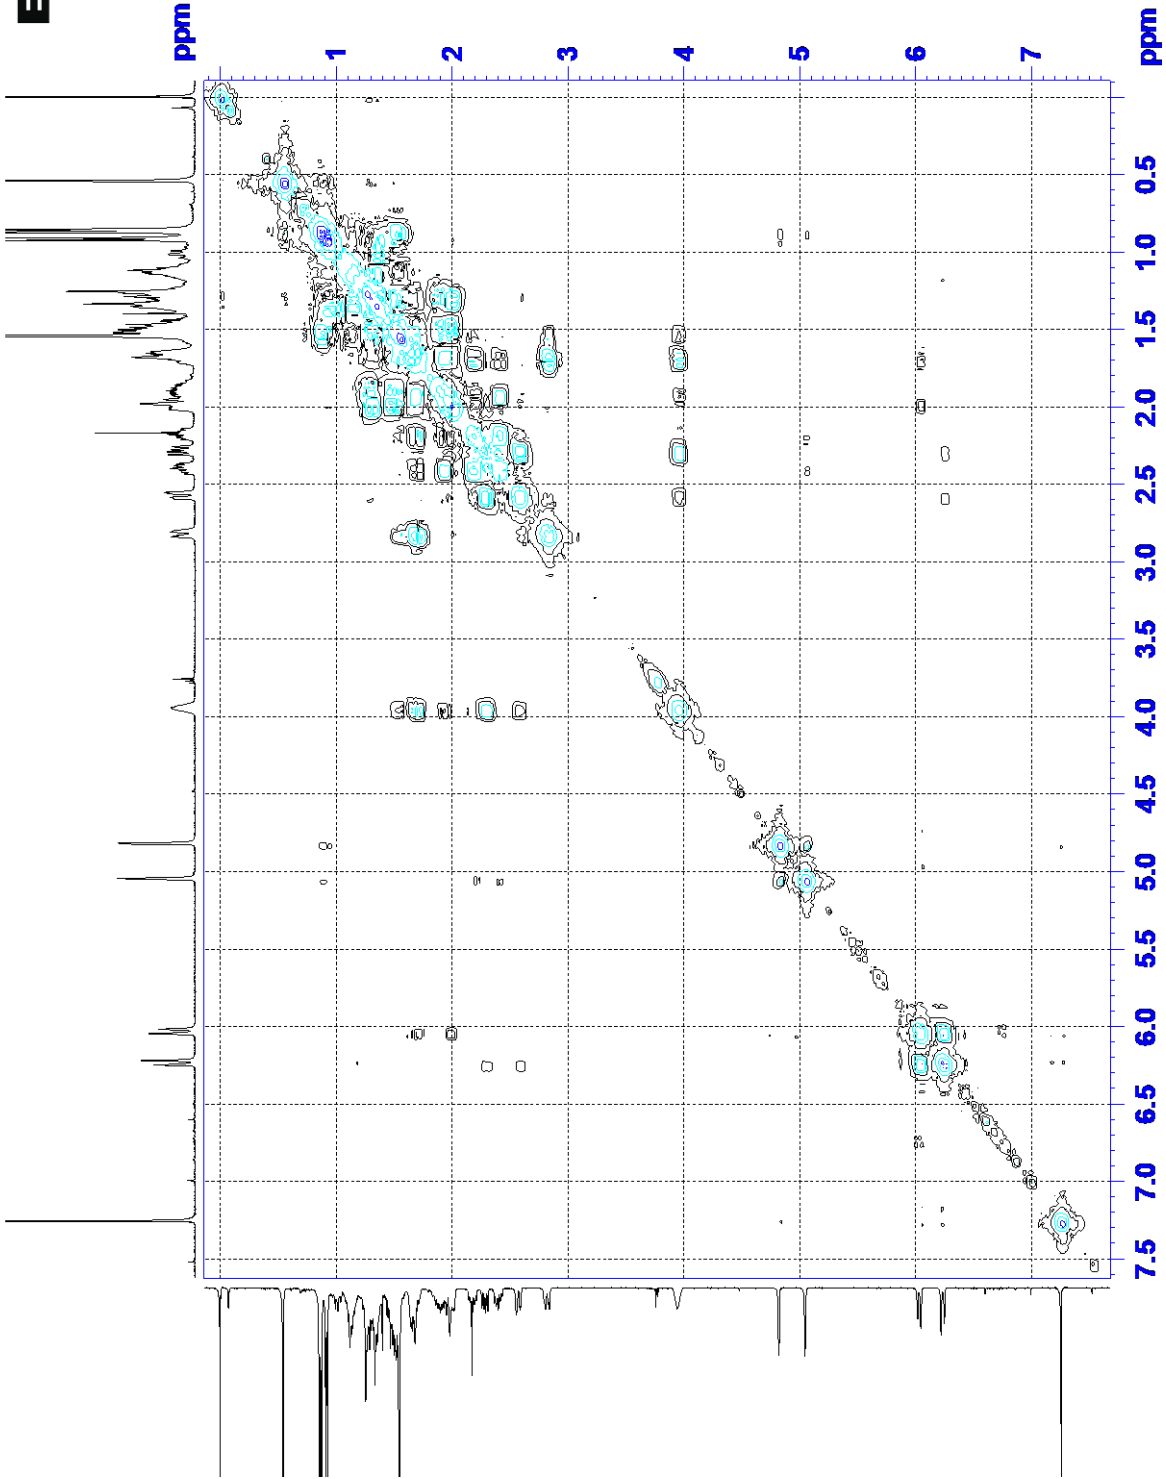

Figure S7.  $^1\text{H}$  COSY NMR spectrum of vitamin D<sub>3</sub> (13).

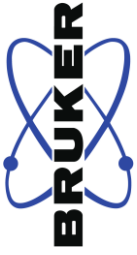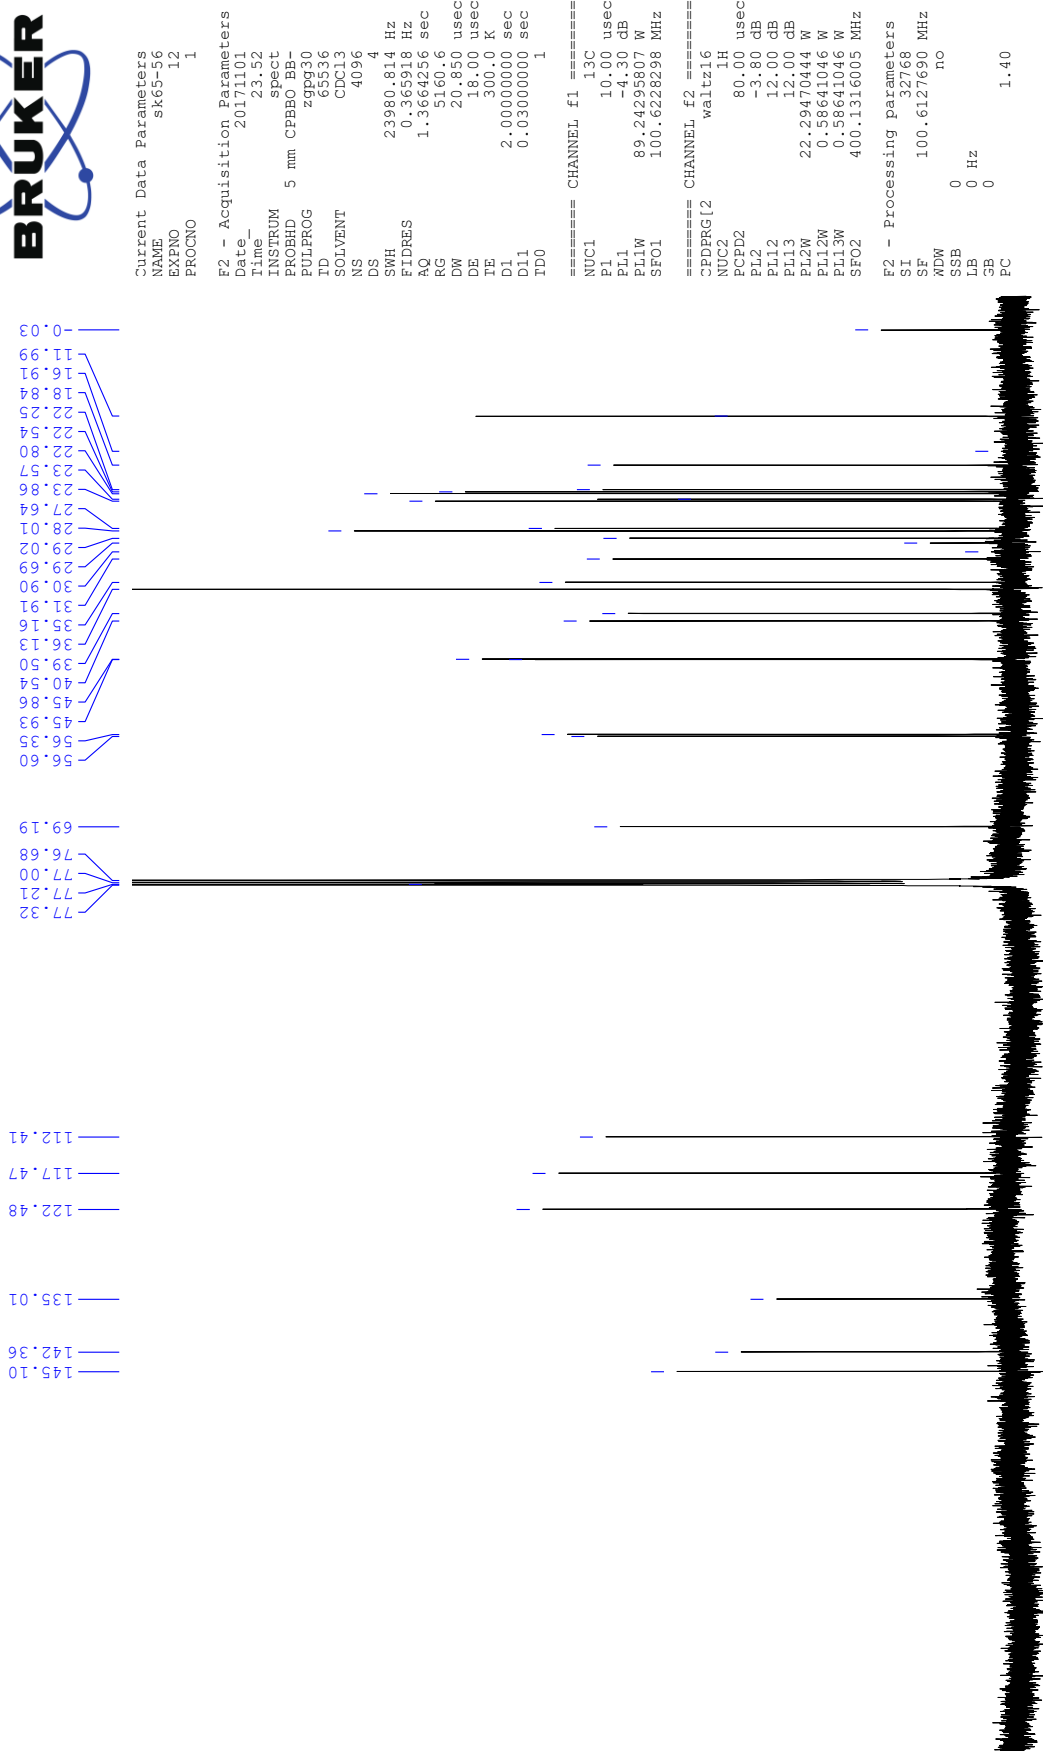

Figure S8. <sup>13</sup>C NMR spectrum of vitamin D<sub>3</sub> (13).

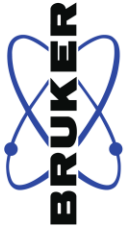

```

Current Data Parameters
NAME          sk65-56
EXPNO         14
PROCNO        1
=====
F2 - Acquisition Parameters
Date_         20171102
Time          0.53
=====
INSTRUM       spect
PROBHD        5 mm CPBBO BB-
PULPROG       hmcgpcpqr4f
PC            1016
SOLVENT       CDCl3
NS            32
DS            16
SWH           5341.880 Hz
AQ            1.304170 Hz
RG            0.3833956 sec
RG2           96441
RG3           5650
RG4           5650
TE            300.0 K
=====
CST13         8.0000000
D0            0.00000300 sec
D1            1.50000000 sec
D6            0.06230000 sec
D16           0.00020000 sec
IN0           0.0006233 sec
=====
===== CHANNEL F1 =====
NUC1          1H
P1            12.00 usec
P2            24.00 usec
PL1           3.60 dB
PL2           21.2937657 dB
PL16          400.1344057 MHz
=====
===== CHANNEL F2 =====
NUC2          13C
P3            10.00 usec
P4            4.30 dB
PL3           89.2235907 MHz
PL4           100.6226130 MHz
=====
===== GRADIENT CHANNEL =====
GPRAM[1]     SINE.100
GPRAM[2]     SINE.100
GPRAM[3]     SINE.100
GRZ1         50.00 %
GRZ2         40.00 %
GRZ3         40.00 %
PL6          1000.00 usec
=====
F1 - Acquisition parameters
TD            128
SF01          100.6228 MHz
FIDRES       174.592422 Hz
SFO1          222.093 ppm
=====
F2 - Processing parameters
SI            1024
SF            400.1300045 MHz
WDW           0
SSB           0 Hz
GB            0
PC            1.40
=====
F1 - Processing parameters
SI            1024
MC2           0F
SF            100.6127995 MHz
WDW           0
SSB           0 Hz
GB            0

```

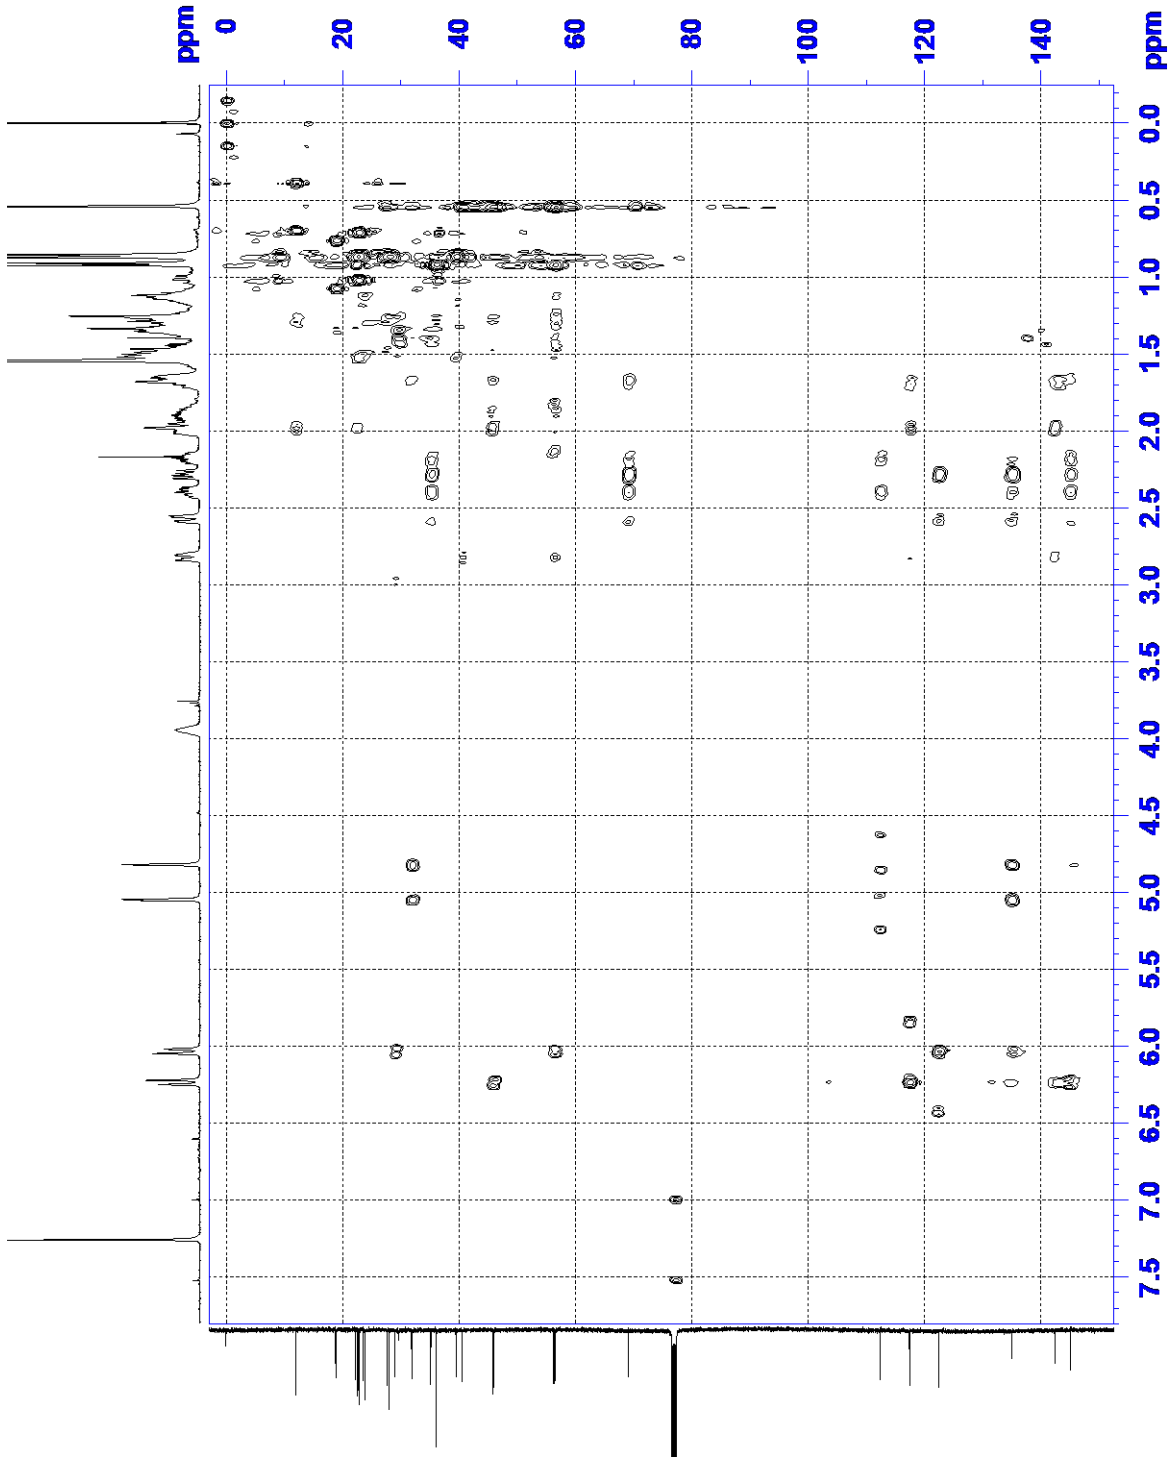

Figure S9. HMBC NMR spectrum of vitamin D<sub>3</sub> (13).

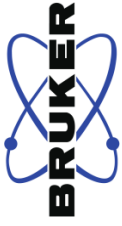

```

Current Data Parameters
NAME      sk65-86-3
EXPNO    10
PROCNO   1

F2 - Acquisition Parameters
Date_    20180308
Time_    13.35
INSTRUM  spect
PROBHD   5 mm CPBBO BB-
PULPROG  zg30
TD        65536
SOLVENT  CDCl3
DS        2
SWH       8278.146 Hz
FIDRES    0.126314 Hz
AQ        3.9583745 sec
RG        32
DM        60.400 usec
DE        299.9 usec
TE        299.2 K
D1        1.00000000 sec
TDO       1

===== CHANNEL f1 =====
NUC1      1H
P1        12.00 usec
PL        0.00 dB
SFO1      400.1324710 MHz
SF01      400.1324710 MHz

F2 - Processing parameters
SI        32768
SF        400.1300092 MHz
WDW       EM
SSB       0 Hz
GB        0
PC        1.00
  
```

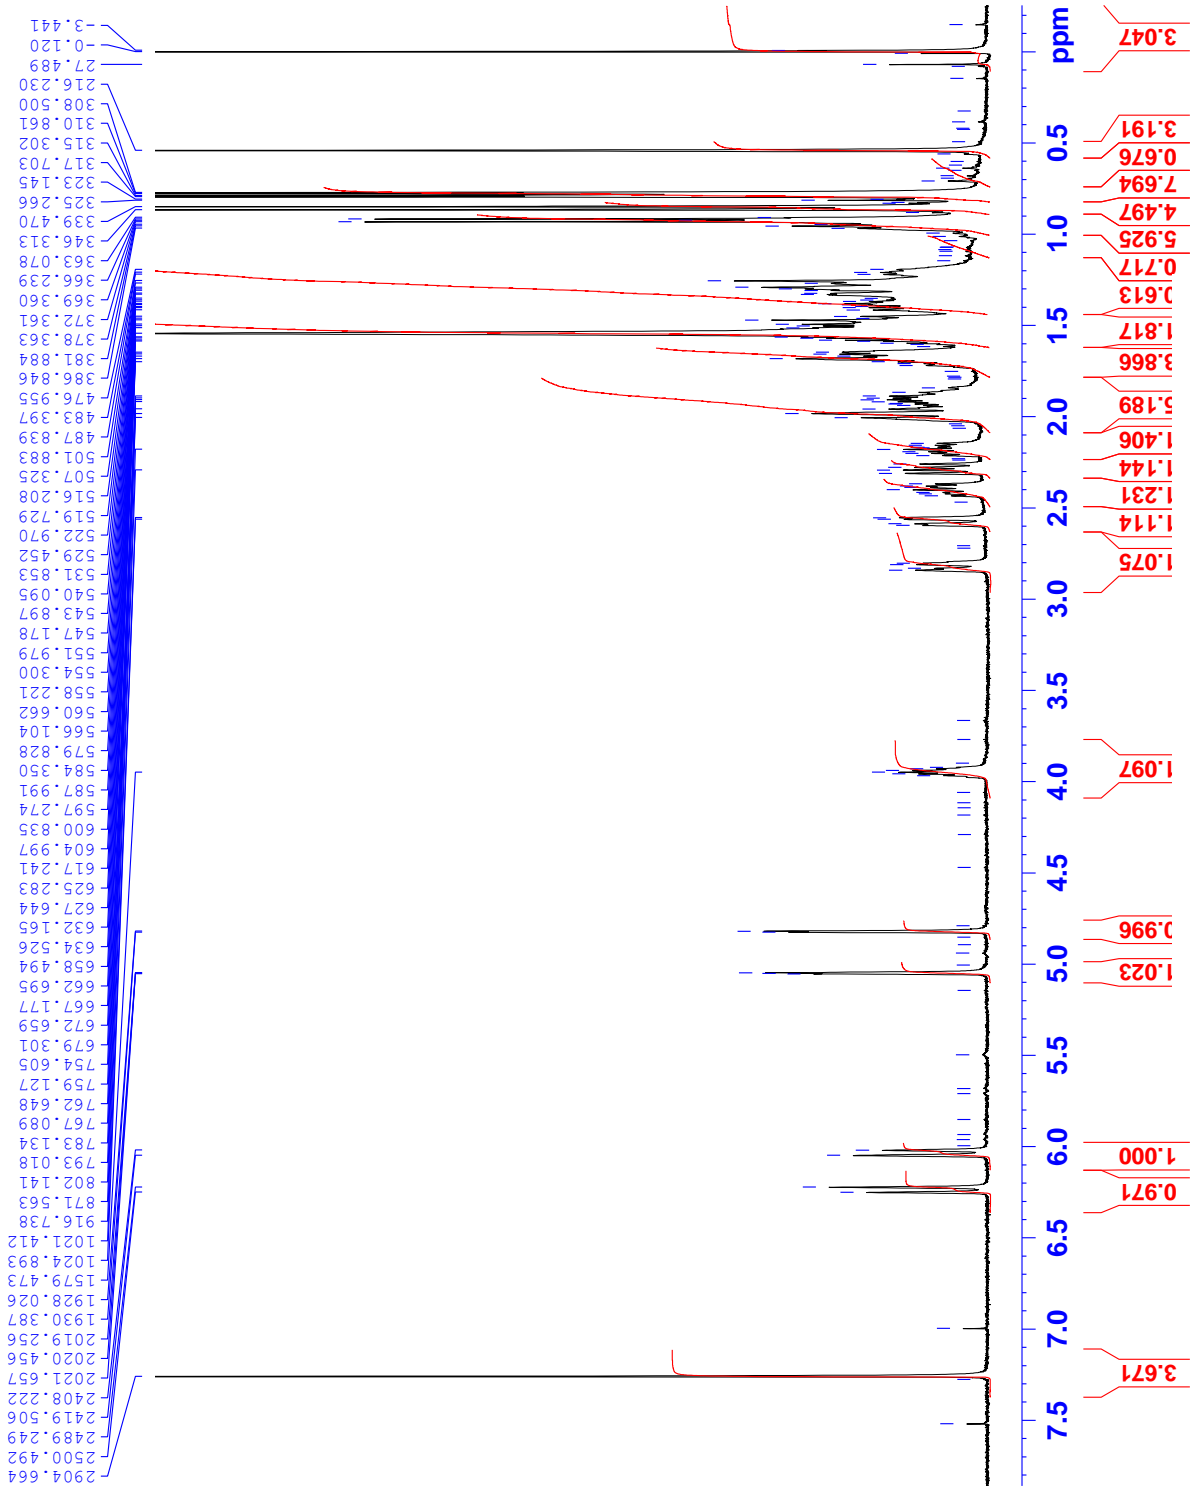

Figure S10. <sup>1</sup>H NMR spectrum of vitamin D<sub>4</sub>(10).

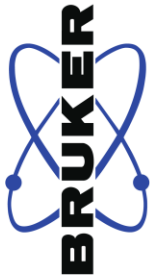

```

Parent Data Parameters
NAME          SK63-06-3
EXPNO        11
PROCNO       1
=====
F2 - Acquisition Parameters
Date_         20180308
Time_        13.37
INSTRUM      spect
PROBHD       5 mm CPBBO BB-
PULPROG      convpqr4f
TD           2048
SOLVENT      CDCl3
NS           1
DS           1
SWH          5341.880 Hz
FIDRES      2.608340 Hz
AQ          0.1316528 sec
RG          436.1
WDW          93.600 usec
SSB          0.000000
GB          300.0 K
PC          0.00000000 sec
RL           1.48689198 sec
SI          313
SF           0.00000400 sec
D1          0.00020000 sec
D16         0.00018720 sec
DNO         0.00018720 sec
===== CHANNEL f1 =====
NUC1         1H
P0           12.00 usec
P1           12.00 usec
PL1         -3.60 dB
PL1W        21.29127693 W
PC1         400.1324057 MHz
===== GRADIENT CHANNEL =====
INVARM[1]   SINE,10.00 %
PC21        10.00
PC16        1000.00 usec
=====
F1 - Acquisition parameters
TD          128
FPO1       400.1324 MHz
FIDRES     41.733440 Hz
SW         13.350 ppm
PACODE     QF
=====
F2 - Processing parameters
SI          1024
SF         400.1300000 MHz
WDW        0 Hz
SSB        0 Hz
GB         0
PC         1.40
=====
F1 - Processing parameters
SI          1024
PC2        QF
SF         400.1300000 MHz
WDW        0 Hz
SSB        0 Hz
GB         0

```

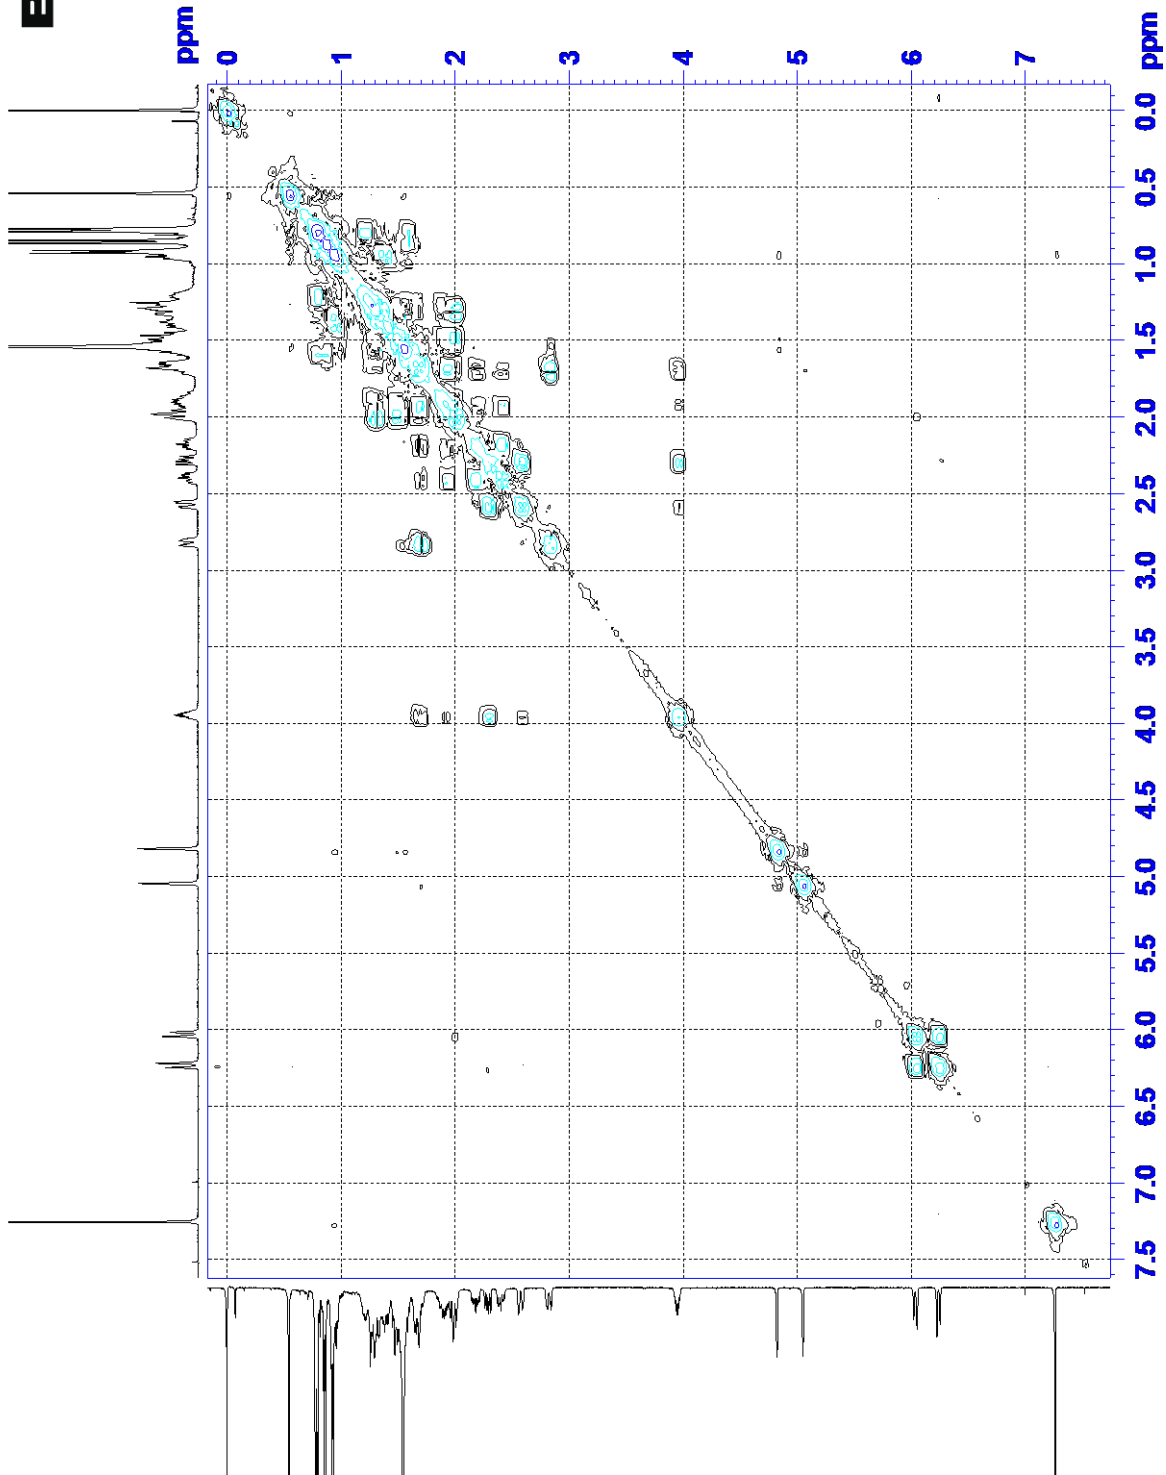

Figure S11. <sup>1</sup>H COSY NMR spectrum of vitamin D<sub>4</sub> (10).

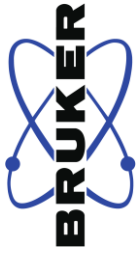

```

Current Data Parameters
NAME      sk65-86-3
EXPNO    12
PROCNO   1

F2 - Acquisition Parameters
Date_    20180308
Time     14.42
INSTRUM spect
PROBHD   5 mm CPBBO BB-
PULPROG zgpg30
TD       65536
SOLVENT  CDCl3
NS       1024
DS       4
SMH      23980.814 Hz
FIDRES   0.365918 Hz
AQ       1.566256 sec
RG       5160.6
DW       20.850 usec
DE       18.00 usec
TE       300.0 K
D1       2.00000000 sec
D11      0.03000000 sec
TD0      1

===== CHANNEL f1 =====
NUC1     13C
P1       10.00 usec
PL1      -4.30 dB
PL1W    89.24295807 W
SFO1    100.6228298 MHz

===== CHANNEL f2 =====
CPDPRG2  waltz16
NUC2     1H
PCPD2   80.00 usec
PL2      -3.80 dB
PL12    12.00 dB
PL13    12.00 dB
PL2W    22.29470444 W
PL12W   0.58641046 W
PL13W   0.58641046 W
SFO2    400.1316005 MHz

F2 - Processing parameters
SI       32768
SF       100.6127690 MHz
AQ       no
SSB      0
LB       0 Hz
GB       0
PC       1.40
  
```

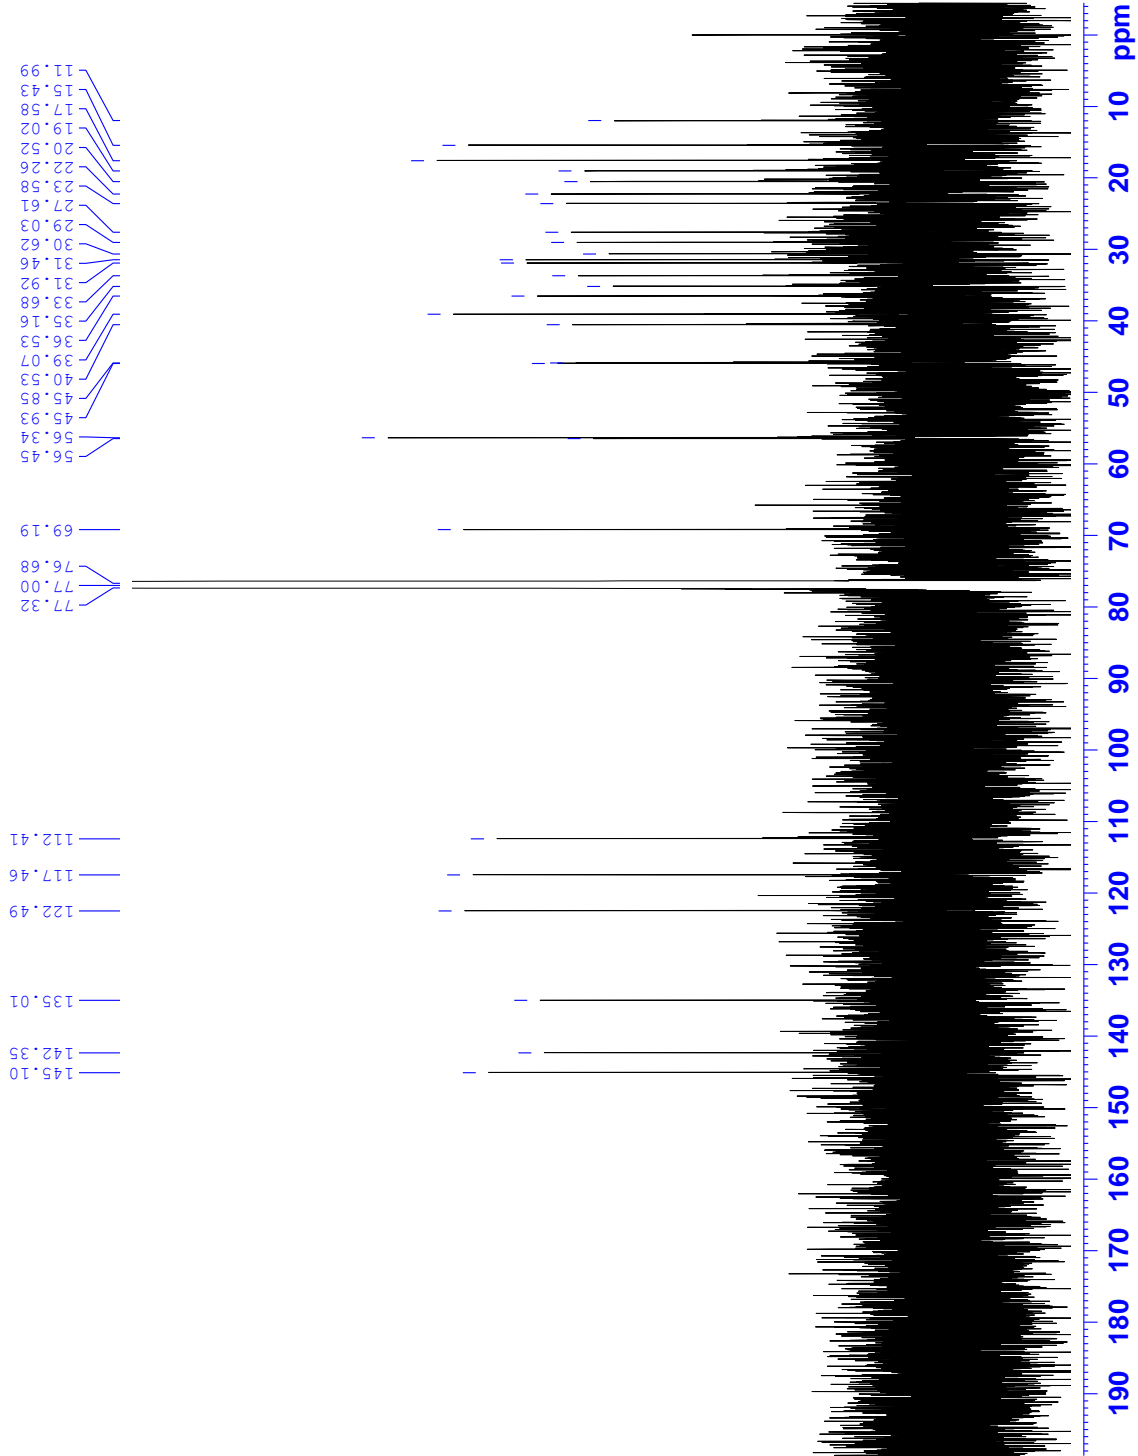

Figure S12. <sup>13</sup>C NMR spectrum of vitamin D<sub>4</sub> (10).

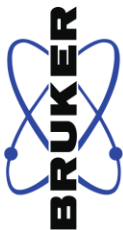

Current Data Parameters  
 NAME 3465-86-3  
 EXPNO 14  
 PROCNO 1

F2 - Acquisition Parameters

Date\_ 20180309  
 Time 13:02  
 PROBHD 5 mm CPBBO BB-  
 PULPROG zgpg30  
 TD 4096  
 SOLVENT CDCl3  
 NS 8  
 DS 16  
 SWH 5341.090 Hz  
 FWHZ 304.490 Hz  
 AQ 0.3833656 sec  
 RG 46341  
 INW 93.600 usec  
 DE 6.50 usec  
 TE 299.9 K  
 CEST13 8.0000000  
 D0 0.0000000 sec  
 D1 0.5000000 sec  
 D5 0.06250000 sec  
 D16 0.00020000 sec  
 INU 0.00002235 sec

==== CHANNEL F1 =====

NUC1 1H  
 P1 12.00 usec  
 PL1 2.00 dB  
 PL2 -3.60 dB  
 PL1W 21.29127693 W  
 SFO1 400.1324057 MHz

==== CHANNEL F2 =====

NUC2 13C  
 P2 10.00 usec  
 PL2 0.00 dB  
 PL2W 89.24295802 W  
 SFO2 100.6228138 MHz

==== GRADIENT CHANNEL =====

GENAM[1] SINE.100  
 GENAM[2] SINE.100  
 GENAM[3] SINE.100  
 GR21 50.00 %  
 GR22 30.00 %  
 GR23 40.10 %  
 PL6 1000.00 usec

F1 - Acquisition parameters

TD 100.228  
 SFO1 400.1324057 MHz  
 FWHZ 304.490 Hz  
 SW 222.095 Ppm  
 EQMODE OP

F2 - Processing parameters

SI 1024  
 SF 400.1300062 MHz  
 SINE  
 NS 0  
 DS 0  
 GB 0  
 PC 1.40

F1 - Processing parameters

SI 1024  
 SF 100.6127487 MHz  
 SINE  
 NS 0  
 DS 0  
 GB 0

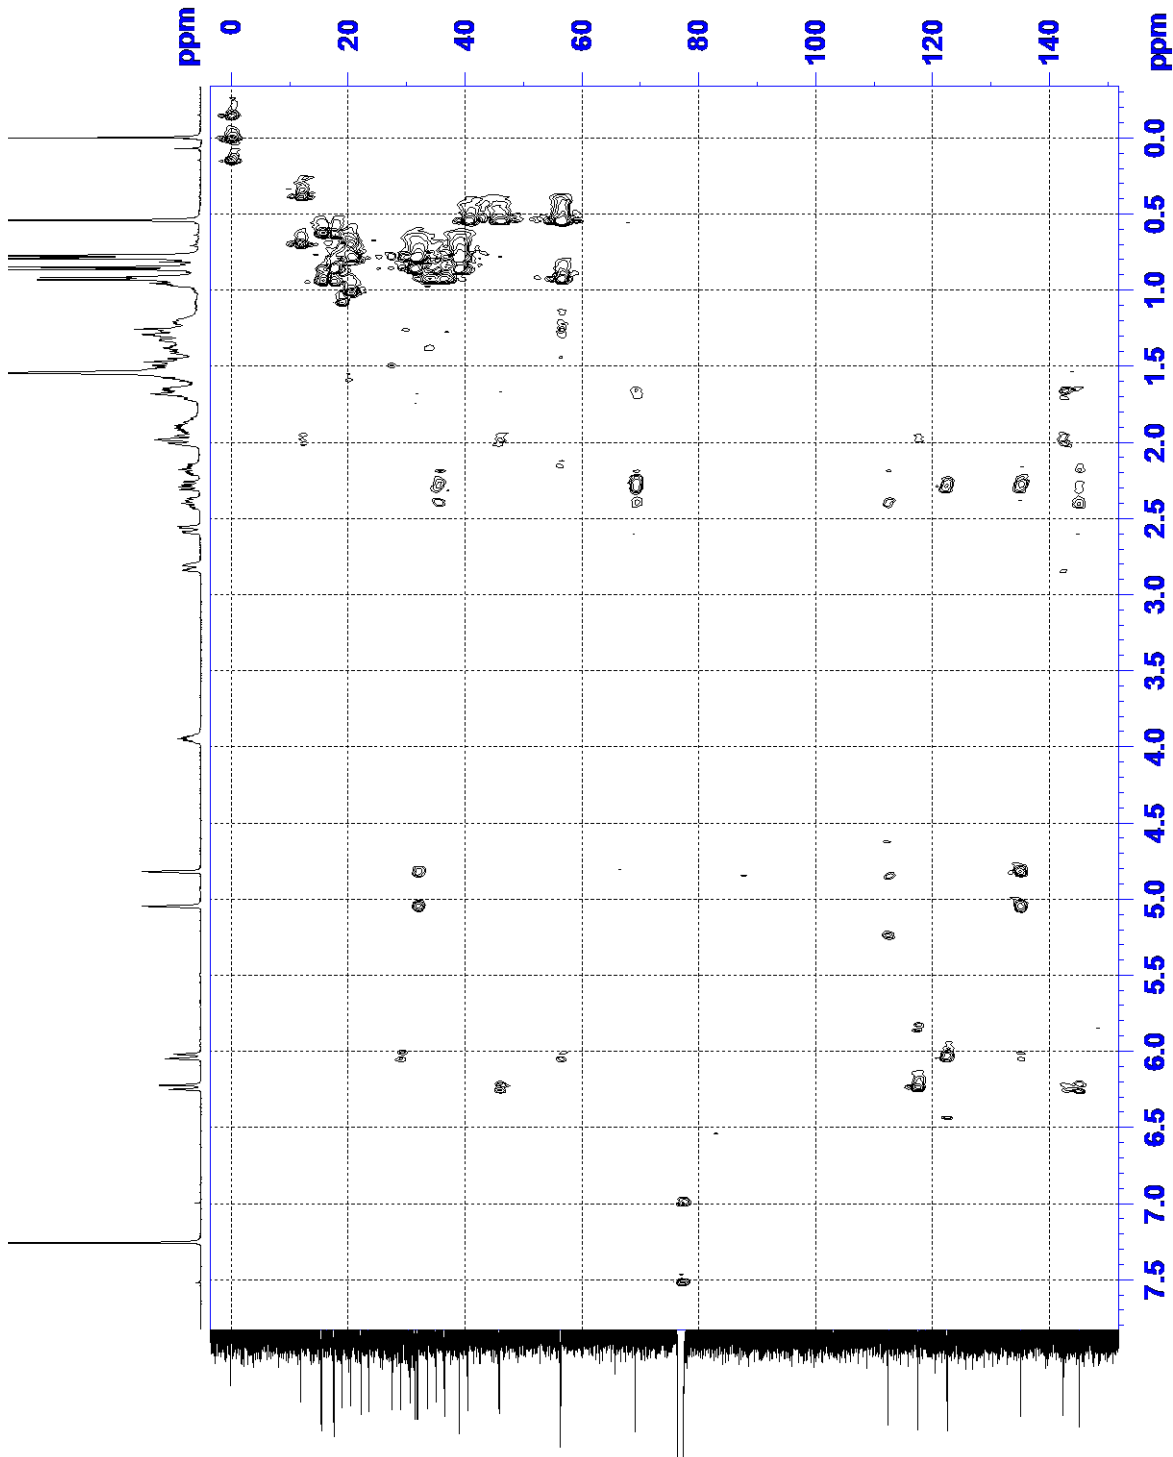

Figure S13. HMBC NMR spectrum of vitamin D<sub>4</sub> (10).

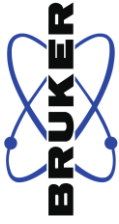

Current Data Parameters  
NAME SK65-85-6  
PROCNO 1  
PROCNO 1  
F2 - Acquisition Parameters  
Date 20180226  
Time 23.50  
INSTRUM spect  
PROBHD 5 mm CPBBO BB-  
TDLPFG 6536  
SOLVENT CDCl3  
NS 16  
DS 2  
SWH 8278.146 Hz  
FIDRES 0.126314 Hz  
AQ 3.9983745 sec  
RG 640  
WDW 60.400 usec  
DE 6.50 usec  
TE 300.0 K  
D1 1.00000000 sec  
TDO 1  
===== CHANNEL f1 =====  
NUC1 1H  
P1 12.00 usec  
PL1 -3.60 dB  
PLW 21.29127693 W  
SF01 400.1324710 MHz  
F2 - Processing Parameters  
SI 32788  
WDW EM  
SSB 0 Hz  
LB 0  
GB 0  
PC 1.00

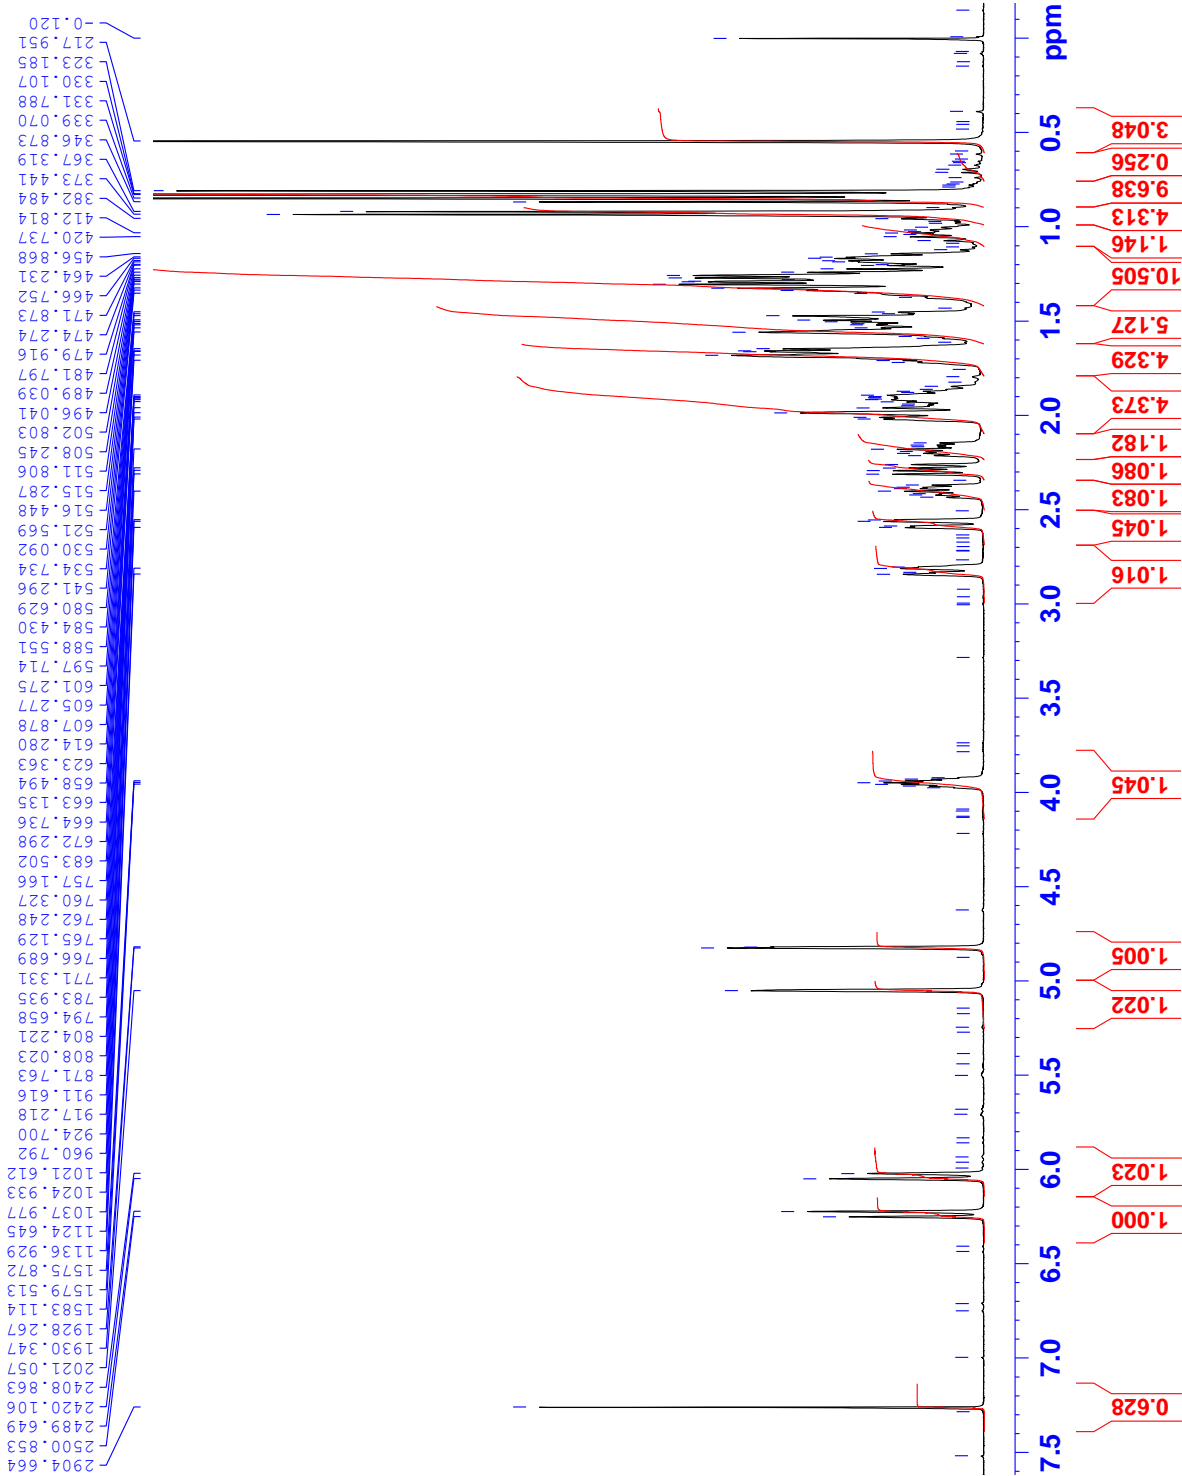

Figure S14. <sup>1</sup>H NMR spectrum of vitamin D<sub>5</sub> (6).



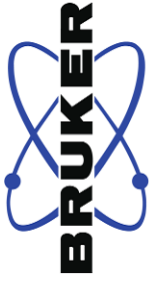

Current Data Parameters  
 NAME ak65-85-6  
 EXPNO 11  
 PROCNO 1

F2 - Acquisition Parameters  
 Date\_ 20180226  
 Time 23.52

INSTRUM spect  
 PROBHD 5 mm CPBBO BB  
 PULPROG zgpg30  
 FIDRES 0.1916928 sec  
 AQ 0.1916928 sec  
 RG 114  
 DW 93.600 usec  
 DE 6.50 usec  
 FE 300.0 K  
 DD 0.00000300 sec  
 D1 1.4868198 sec  
 D13 0.0000400 sec  
 D16 0.0002000 sec  
 LMO 0.00016720 sec

CHANNEL f1  
 NUCL1 1H  
 P0 12.00 usec  
 P1 12.00 usec  
 PL1 -3.60 dB  
 PL1W 21.29127693 W  
 SF01 400.1324057 MHz

GRADIENT CHANNEL  
 SPNAM11 SINE.100  
 SP21 10.00 %  
 P16 1000.00 usec

F1 - Acquisition parameters  
 FID 128  
 SF01 400.1324 MHz  
 FIDRES 41.733940 Hz  
 SW 13.350 PPM  
 FREQ02 QF

F2 - Processing parameters  
 SI 1024  
 SF 400.1300034 MHz  
 SINE SINE  
 NSB 0  
 LB 0 Hz  
 SB 0  
 PC 1.40

F1 - Processing parameters  
 SI 1024  
 SC2 QF  
 SF 400.1300026 MHz  
 SINE SINE  
 NSB 0 Hz  
 LB 0  
 SB 0

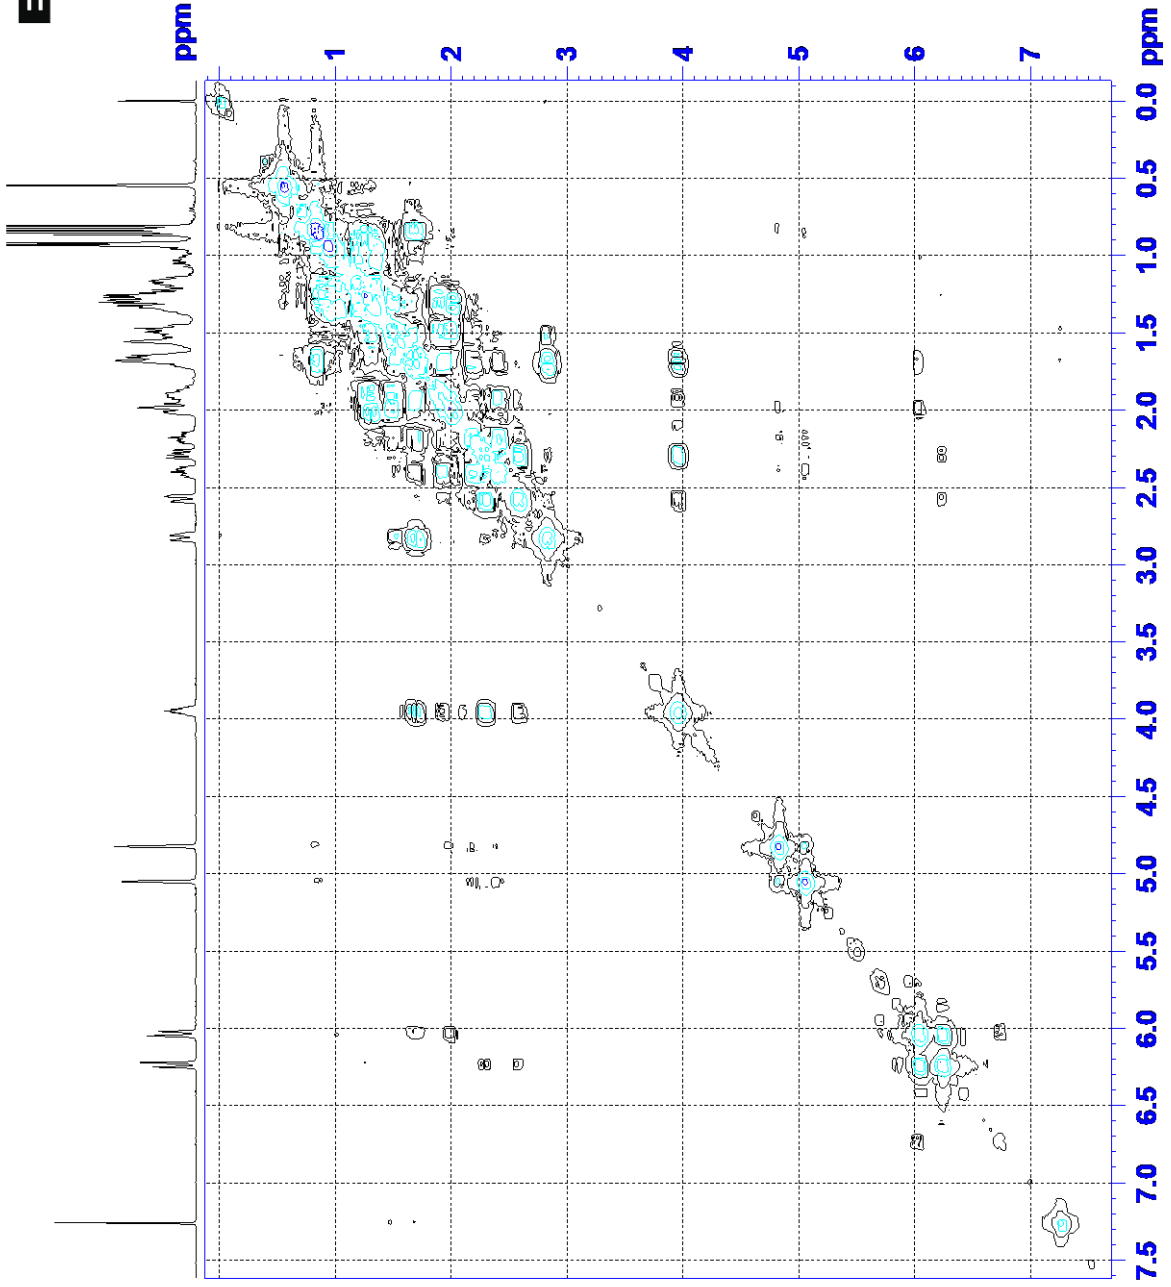

Figure S15. <sup>1</sup>H-<sup>1</sup>H COSY NMR spectrum of vitamin D<sub>5</sub> (6).

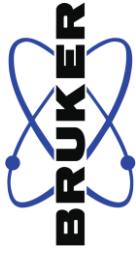

Current Data Parameters  
NAME sk65-85-6  
EXPNO 12  
PROCNO 1

F2 - Acquisition Parameters  
Date\_ 20180227  
Time\_ 0.57  
INSTRUM spect  
PROBHD 5 mm CPBBO BB-  
PULPROG zgpg30  
TD 65536  
SOLVENT CDCl3  
NS 1024  
DS 4  
SFOH 23980.814 Hz  
FIDRES 0.365918 Hz  
AQ 1.5668256 sec  
RG 5792.6  
DW 20.850 usec  
DE 18.00 usec  
TE 300.0 K  
D1 2.00000000 sec  
D11 0.03000000 sec  
TD0 1

=====  
CHANNEL f1 =====  
NUC1 13C  
P1 10.00 usec  
PL1 -4.30 dB  
PL1W 89.24295807 W  
SFO1 100.6228298 MHz

=====  
CHANNEL f2 =====  
CPDPRG2 waltz16  
NUC2 1H  
PCPD2 80.00 usec  
PL2 -3.80 dB  
PL12 12.00 dB  
PL13 12.00 dB  
PL2W 22.2947044 W  
PL12W 0.58641046 W  
PL13W 0.58641046 W  
SFO2 400.1316005 MHz

F2 - Processing parameters  
SI 32768  
SF 100.6127690 MHz  
ADW EM  
SSB 0  
LB 1.00 Hz  
GB 0  
PC 1.40

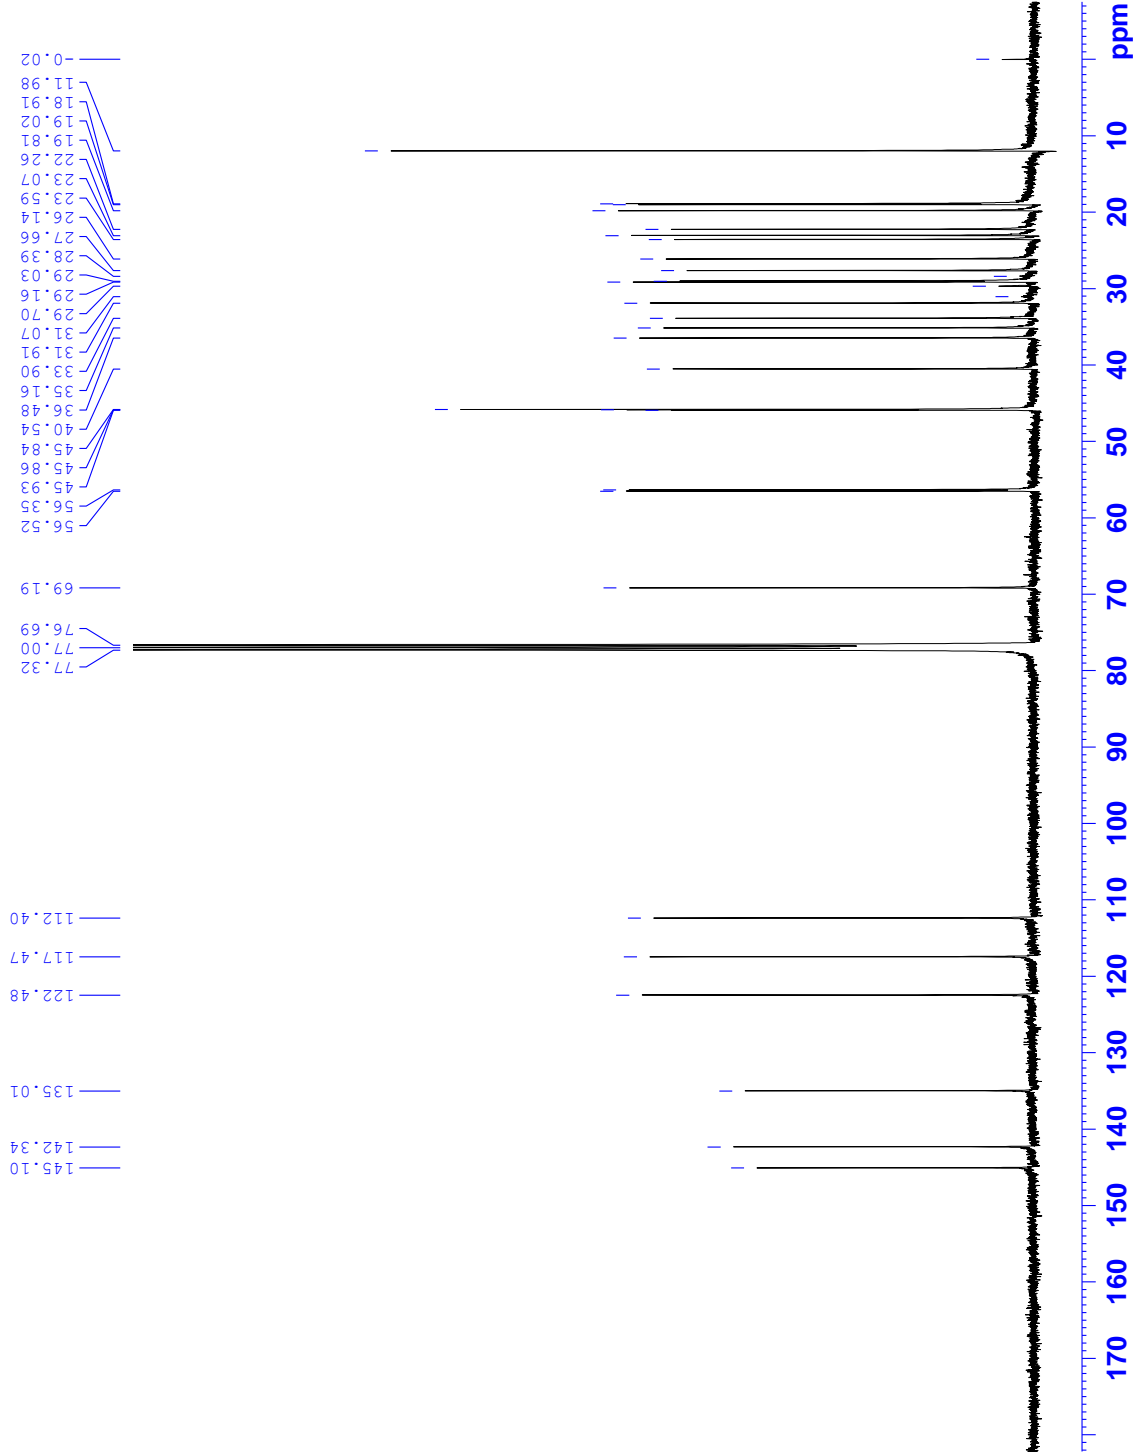

Figure S16. <sup>13</sup>C NMR spectrum of vitamin D<sub>5</sub> (6).

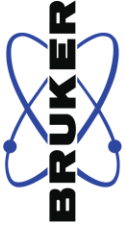

```

Current Data Parameters
NAME          sk65-85-6
EXPNO         14
PROCNO        1
F2 - Acquisition Parameters
Date_         20180227
Time          1.16
INSTRUM       spect
PROBHD        5 mm CPBBO BB-
PULPROG       hmcpspqc4f
SOLVENT       DMS
SOLVENT       CDCl3
NS            8
DS            16
SWH           5341.880 Hz
FIDRES        1.304170 Hz
AQ            0.381356 sec
RG            4624
DE            93.600 usec
TE            300.0 K
CNST13        8.0000000
D0            0.0000300 sec
D1            1.5000000 sec
D6            0.0625000 sec
D16           0.0000000 sec
D18           0.0002235 sec
===== CHANNEL f1 =====
NUC1           1H
P1            12.00 usec
P2            24.00 usec
PL1           3.60 dB
PL2           3.60 dB
SFO1          400.1324057 MHz
===== CHANNEL f2 =====
NUC2           13C
P3            10.00 usec
PL3           -4.30 dB
PL12         99.2425507 W
SFO2          100.626150 MHz
===== GRADIENT CHANNEL =====
GENDAM[1]     SINE.100
GENDAM[2]     SINE.100
GENDAM[3]     SINE.100
GRZ1          50.00 %
GRZ2          40.10 %
GRZ3          40.10 %
P16           1000.00 usec
F1 - Acquisition parameters
TD            128
SFO1          100.6228 MHz
FIDRES        174.552422 Hz
AQ            222.000000 sec
PAMODE        CP
F2 - Processing parameters
SI            1024
SF            400.1300037 MHz
WDW           SINE
SSB           0 Hz
GB            0
PC            1.40
F1 - Processing parameters
SI            1024
MC2           CP
SFO2          100.617692 MHz
WDW           SINE
SSB           0
LB            0 Hz
GB            0
  
```

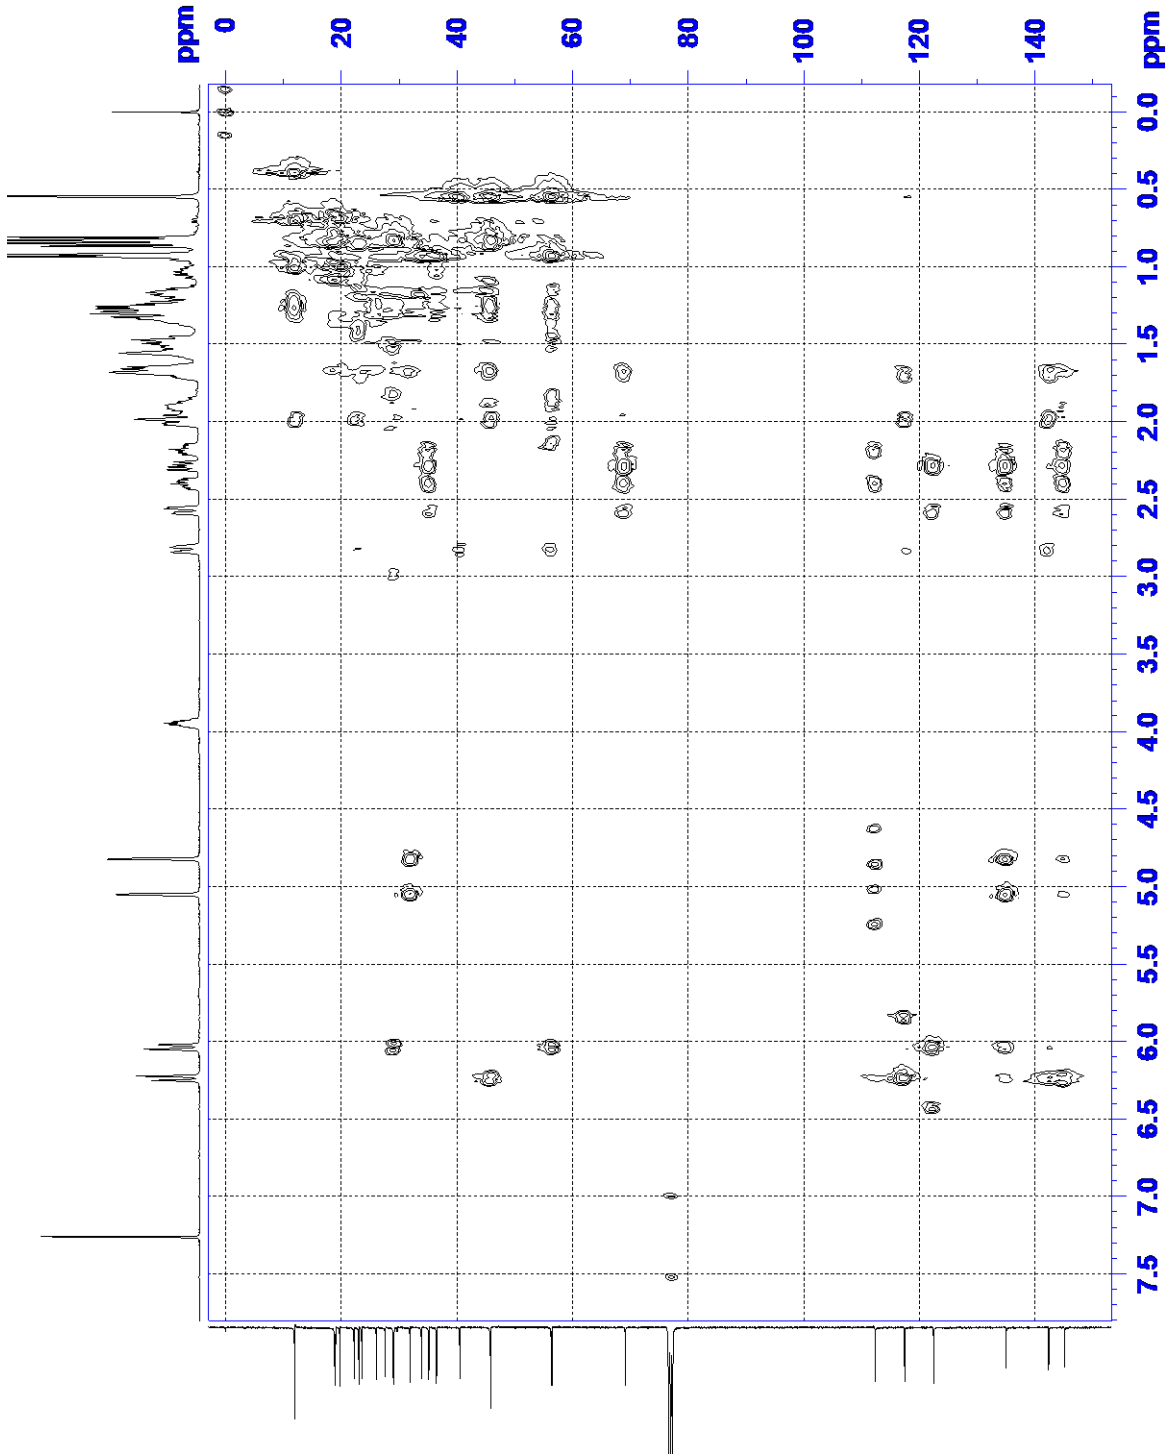

Figure S17. HMBC NMR spectrum of vitamin D<sub>5</sub> (6).

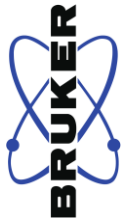

Current Data Parameters  
NAME sk65-86-1  
EXENO 10  
PROCNO 1

F2 - Acquisition Parameters  
Date\_ 20180308  
Time\_ 9:20  
INSTRUM spect  
PROBHD 5 mm CPBBO BB-  
PULPROG zg30  
TD 65536  
SOLVENT CDCl3  
NS 12  
DS 2  
SWH 8278.146 Hz  
FIDRES 0.126314 Hz  
AQ 3.9583745 sec  
RG 32  
DM 60.400 usec  
DE 6.50 usec  
TE 300.00 K  
D1 1.00000000 sec  
TDO 1

==== CHANNEL f1 =====  
NUC1 1H  
P1 12.00 usec  
PL1 0.00 dB  
PL2 21.20173.60 dB  
PL3 0.00 dB  
PL4 0.00 dB  
SFO1 400.1324710 MHz

F2 - Processing parameters  
SI 32768  
SF 400.1300092 MHz  
WDW EM  
SSB 0  
LB 0 Hz  
GB 0  
PC 1.00

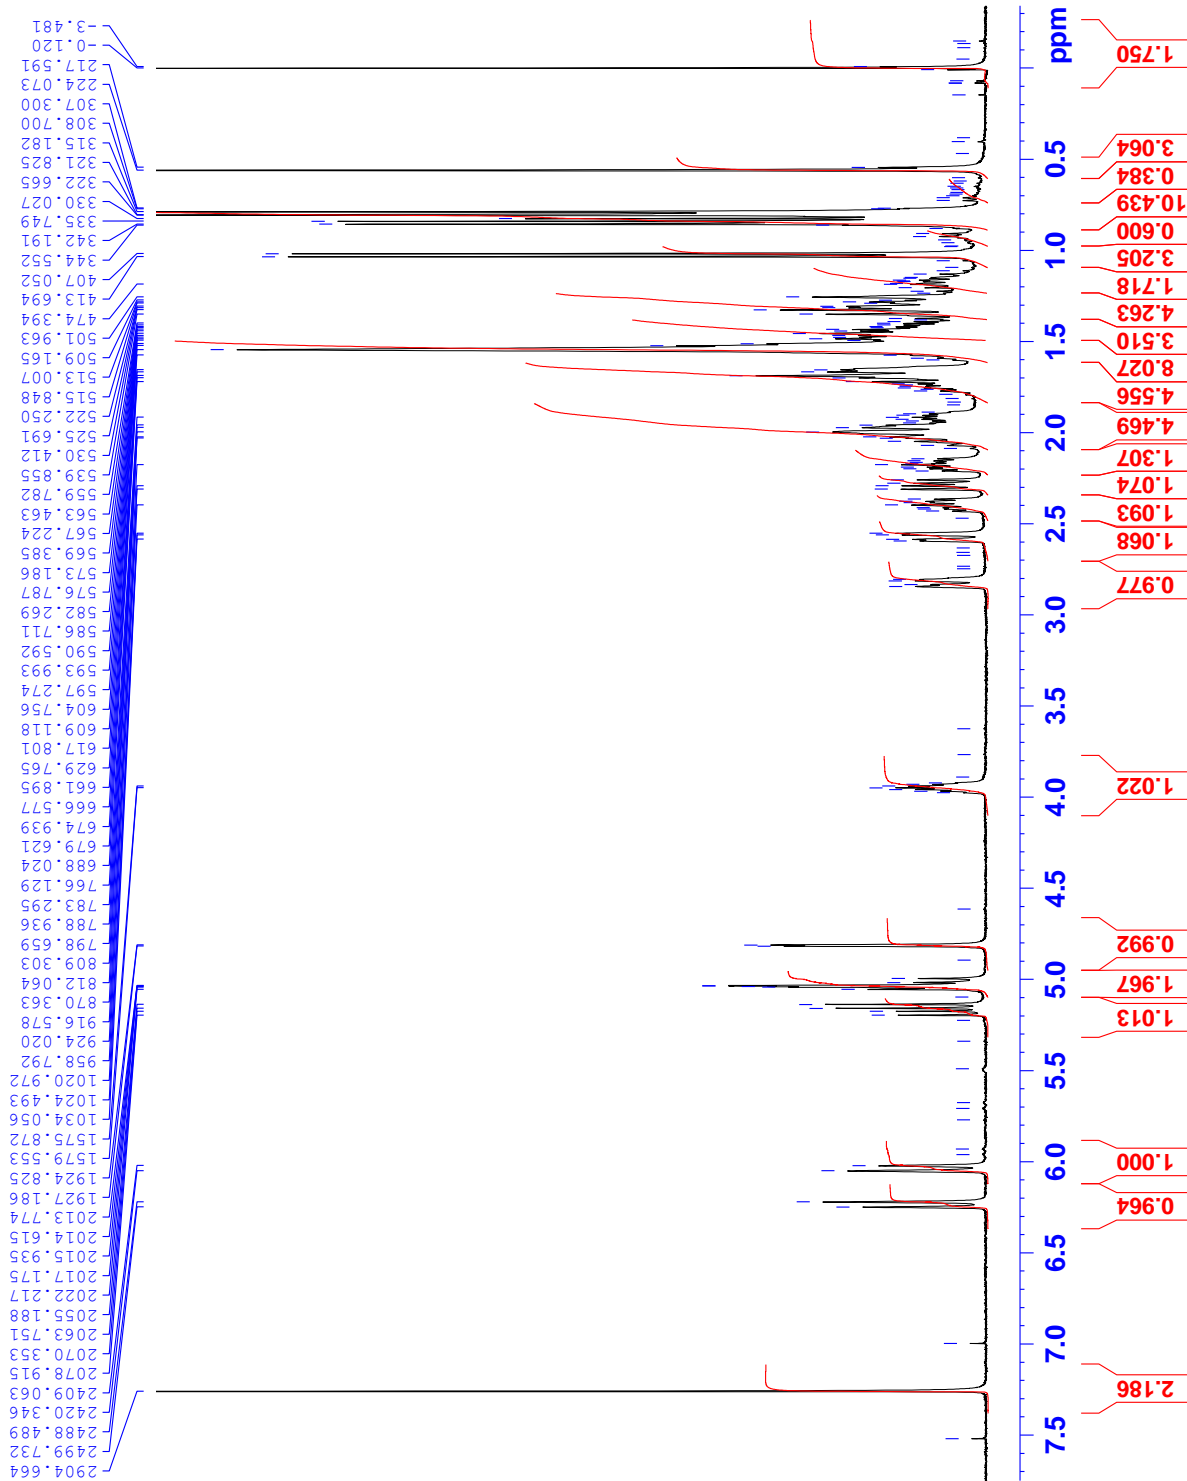

Figure S18. <sup>1</sup>H NMR spectrum of vitamin D<sub>6</sub> (8).

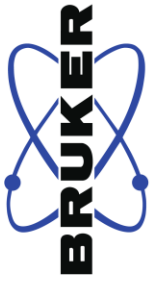

Current Data Parameters  
 NAME: SKE3-06-11  
 EXPNO: 11  
 PROCNO: 1

F2 - Acquisition Parameters

Date: 20180308  
 Time: 9.22  
 INSTRUM: spect  
 PROBHD: 5 mm CPBBO BB-  
 PULPROG: coasyphf  
 ED: 2048  
 SOLVENT: CDCl3  
 NS: 1  
 DS: 8  
 SWH: 5341.880 Hz  
 FIDRES: 2.608340 Hz  
 AQ: 0.1316328 sec  
 RG: 93.362 usec  
 RW: 6.500 usec  
 RE: 6.500 usec  
 KE: 300.0 K  
 JO: 0.0000300 sec  
 SI: 1.48689198 sec  
 S1: 0.0000400 sec  
 S16: 0.0002000 sec  
 ENO: 0.00018720 sec

==== CHANNEL F1 =====  
 FOC1: 1H  
 P0: 12.00 usec  
 P1: 12.00 usec  
 PL1: -3.60 dB  
 PL1W: 21.29127693 W  
 FFO1: 400.1324057 MHz

==== GRADIENT CHANNEL =====  
 SPAM[1]: SINK\_100  
 SPZ1: 10.00 %  
 SP16: 1000.00 usec

F1 - Acquisition parameters  
 ED: 128  
 FFO1: 400.1324 MHz  
 FIDRES: 41.733440 Hz  
 SW: 13.350 ppm  
 P1: 1.40

F2 - Processing parameters  
 SI: 1024  
 SF: 400.1300000 MHz  
 SINE  
 TDW: 0 Hz  
 SB: 0 Hz  
 SC: 0 Hz

F1 - Processing parameters  
 SI: 1024  
 CP: 0  
 SF: 400.1300000 MHz  
 SINE  
 TDW: 0 Hz  
 SB: 0 Hz

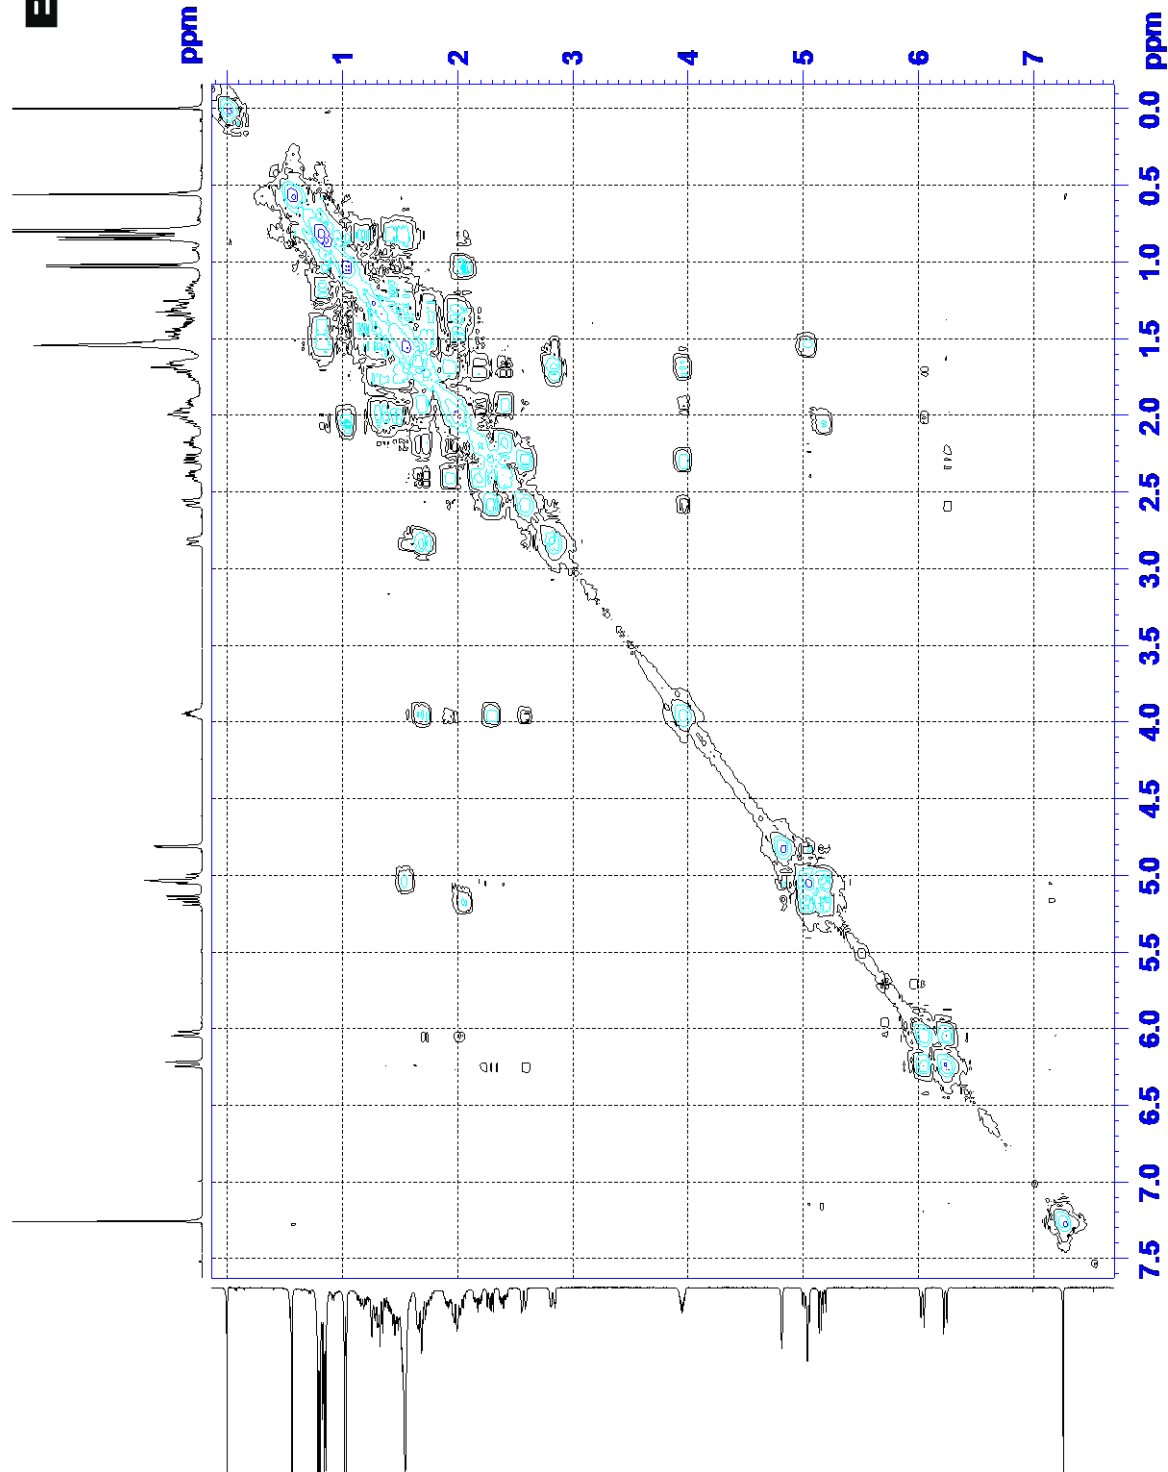

Figure S19. <sup>1</sup>H<sup>1</sup>H COSY NMR spectrum of vitamin D<sub>6</sub> (8).

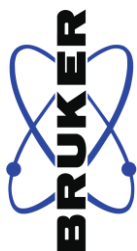

145.08  
 142.24  
 138.09  
 135.05  
 129.52  
 122.45  
 117.51  
 112.38  
 77.32  
 77.00  
 76.68  
 69.19  
 56.45  
 56.39  
 51.24  
 45.92  
 45.75  
 40.73  
 40.42  
 35.15  
 31.88  
 29.69  
 29.00  
 25.39  
 23.57  
 22.32  
 21.34  
 21.07  
 18.97  
 18.25  
 15.36  
 12.23  
 12.00  
 0.02

```

Current Data Parameters
NAME      sk65-86-1
EXPNO    12
PROCNO   1

F2 - Acquisition Parameters
Date_    20180308
Time     10.28
INSTRUM  spect
PROBHD   5 mm CPBBO BB-
PULPROG  zgpg30
TD        65536
SOLVENT  CDCl3
NS        1024
DS         4
SWH       23980.814 Hz
FIDRES    0.365918 Hz
AQ         1.3664256 sec
RG         5160.6
WDW        20.850 usec
DE         18.00 usec
TE         300.0 K
D1         2.0000000 sec
d11        0.0300000 sec
TD0        1

===== CHANNEL f1 =====
NUC1       13C
P1         10.00 usec
PL1        -4.30 dB
PL1W       89.24295807 W
SFO1       100.6228298 MHz

===== CHANNEL f2 =====
2FDRPG12  waltz16
NUC2       1H
PCPD2      80.00 usec
PL2        -3.80 dB
PL12       12.00 dB
PL13       12.00 dB
PL2W       22.29470444 W
PL12W      0.58641046 W
PL13W      0.58641046 W
SFO2       400.1316005 MHz

F2 - Processing parameters
SI         32768
SF         100.6127690 MHz
AQ         EM
WDW        0
SSB        0
LB         1.00 Hz
GB         0
PC         1.40
  
```

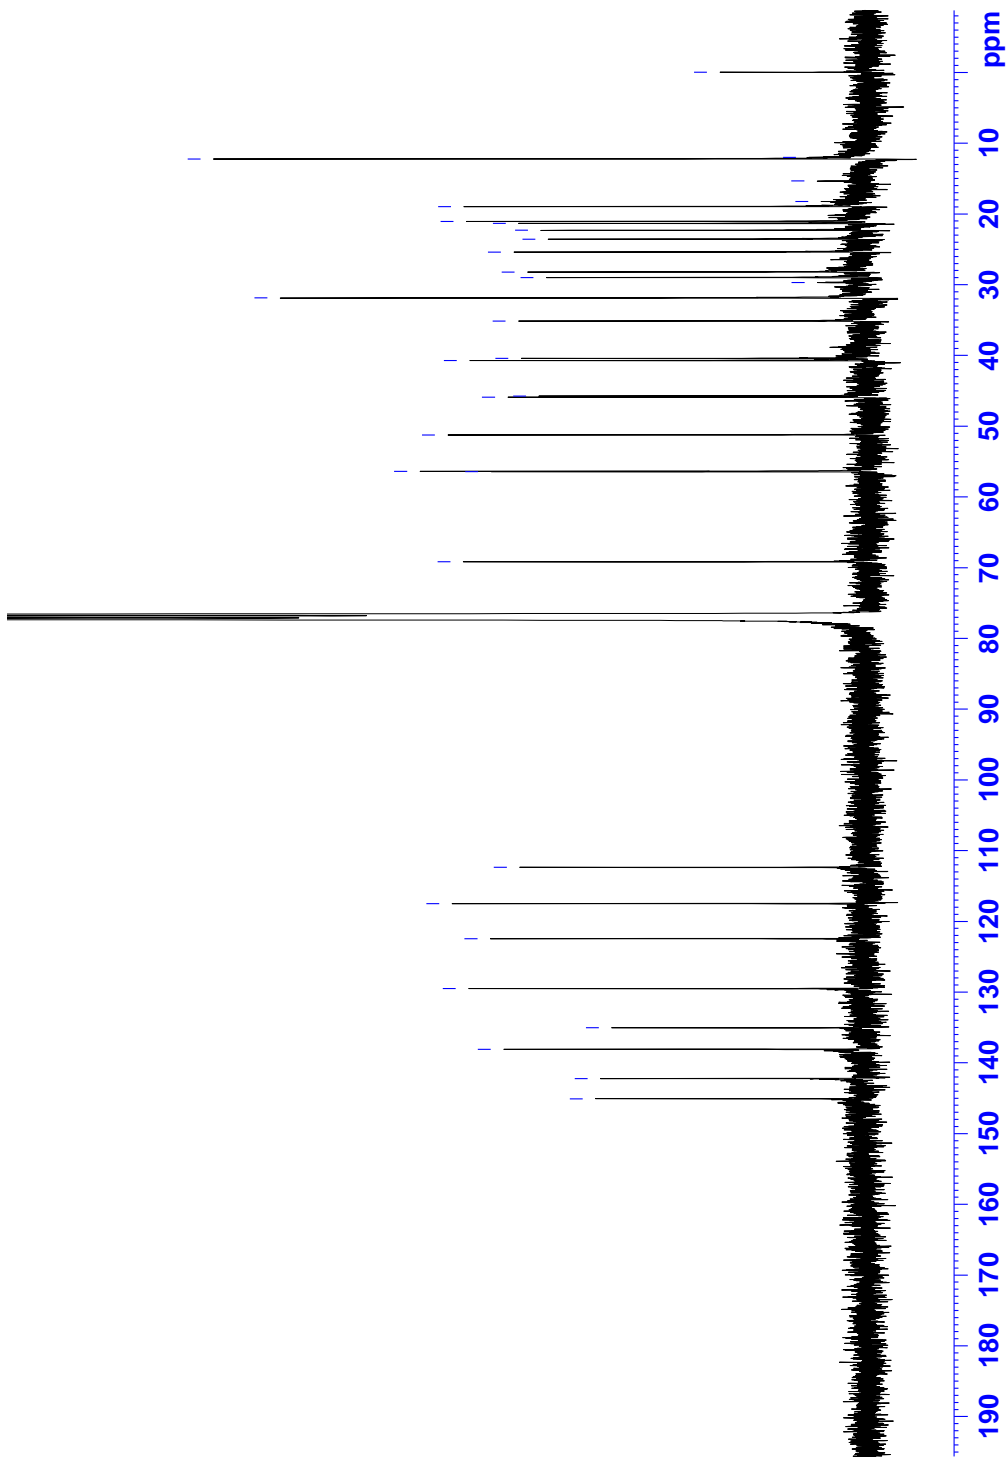

Figure S20. <sup>13</sup>C NMR spectrum of vitamin D<sub>6</sub> (8).

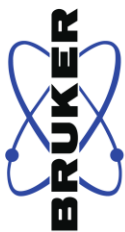

```

Current Data Parameters
NAME          s163-867-1
PROCNO       1
PROBHD       1
PULPROG      zgpg30
PROCNO       1
F2 - Acquisition Parameters
Date_        20180308
Time         10.47
INSTRUM      spect
PROBHD       5 mm CPBBO
PULPROG      zgpg30
SOLVENT      DMSO-d6
TD           4096
AQ           0.395866 sec
RG           46341
WDW          EM
SSB          0
GB           0
PC           1.40
DE           6.50 usec
TE           299.9 K
===== CHANNEL F1 =====
NUC1         1H
P1           12.00 usec
PL1          -1.50 dB
PC1          0.00 usec
===== CHANNEL F2 =====
NUC2         13C
P2           10.00 usec
PL2          -1.50 dB
PC2          0.00 usec
===== GRADIENT CHANNEL =====
GPRAM[1]    SINE.100
GPRAM[2]    SINE.100
GPRAM[3]    SINE.100
GR21        30.00 %
GR22        40.10 %
GR23        40.10 %
GR24        1000.00 usec
===== Acquisition parameters =====
TD           128
SF01         100.628138 MHz
SF02         100.628138 MHz
===== Processing parameters =====
SI           1024
SF           100.628138 MHz
WDW          EM
SSB          0
GB           0
PC           1.40
===== Acquisition parameters =====
Date_        20180308
Time         10.47
INSTRUM      spect
PROBHD       5 mm CPBBO
PULPROG      zgpg30
SOLVENT      DMSO-d6
TD           4096
AQ           0.395866 sec
RG           46341
WDW          EM
SSB          0
GB           0
PC           1.40
===== Processing parameters =====
SI           1024
SF           100.628138 MHz
WDW          EM
SSB          0
GB           0

```

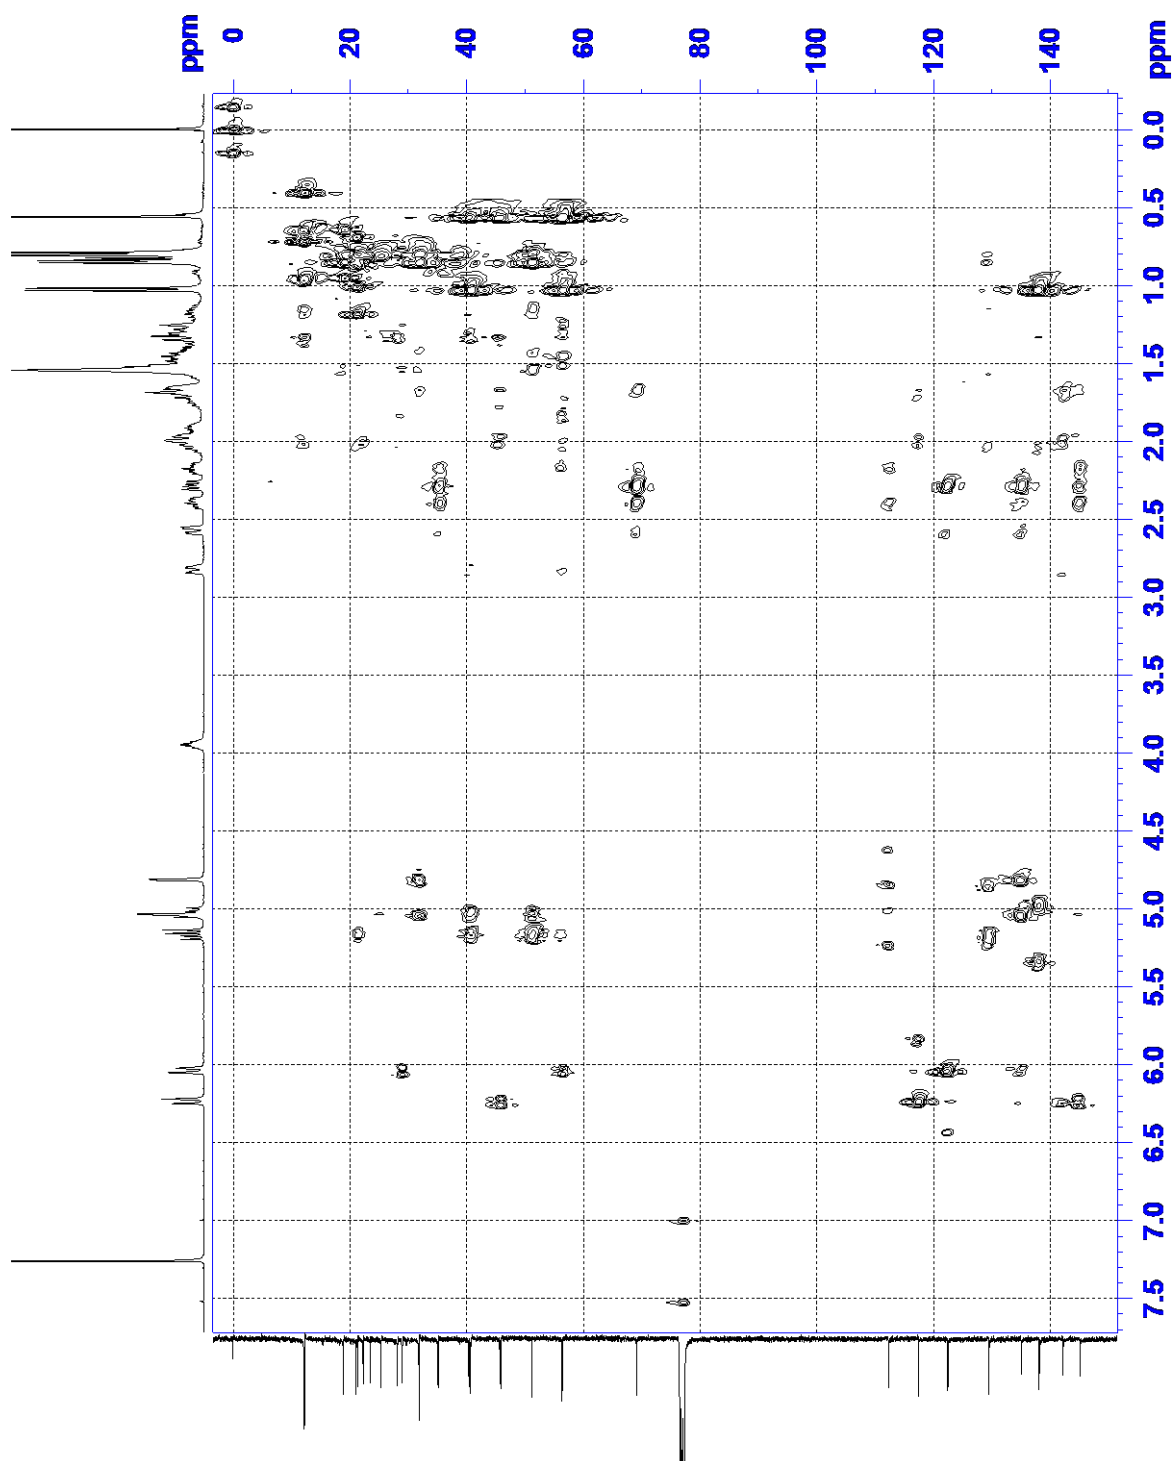

Figure S21. HMBC NMR spectrum of vitamin D<sub>6</sub>(8).

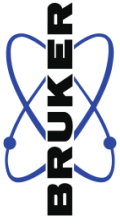

```

Current Data Parameters
NAME      S163-01
EXPNO     10
PROCNO    1

F2 - Acquisition Parameters
Date_     20180308
Time     11.28
PROBHD   spect
PULPROG  zgpg30
TD        65536
SOLVENT  CDCl3
NS        16
DS        2
SWH       8278.146 Hz
AQ        0.167141 sec
RG        3.9593745
RG2       32
RG3       32
RG4       32
RG5       32
RG6       32
RG7       32
RG8       32
RG9       32
RG10      32
RG11      32
RG12      32
RG13      32
RG14      32
RG15      32
RG16      32
RG17      32
RG18      32
RG19      32
RG20      32
RG21      32
RG22      32
RG23      32
RG24      32
RG25      32
RG26      32
RG27      32
RG28      32
RG29      32
RG30      32
RG31      32
RG32      32
RG33      32
RG34      32
RG35      32
RG36      32
RG37      32
RG38      32
RG39      32
RG40      32
RG41      32
RG42      32
RG43      32
RG44      32
RG45      32
RG46      32
RG47      32
RG48      32
RG49      32
RG50      32
RG51      32
RG52      32
RG53      32
RG54      32
RG55      32
RG56      32
RG57      32
RG58      32
RG59      32
RG60      32
RG61      32
RG62      32
RG63      32
RG64      32
RG65      32
RG66      32
RG67      32
RG68      32
RG69      32
RG70      32
RG71      32
RG72      32
RG73      32
RG74      32
RG75      32
RG76      32
RG77      32
RG78      32
RG79      32
RG80      32
RG81      32
RG82      32
RG83      32
RG84      32
RG85      32
RG86      32
RG87      32
RG88      32
RG89      32
RG90      32
RG91      32
RG92      32
RG93      32
RG94      32
RG95      32
RG96      32
RG97      32
RG98      32
RG99      32
RG100     32
RG101     32
RG102     32
RG103     32
RG104     32
RG105     32
RG106     32
RG107     32
RG108     32
RG109     32
RG110     32
RG111     32
RG112     32
RG113     32
RG114     32
RG115     32
RG116     32
RG117     32
RG118     32
RG119     32
RG120     32
RG121     32
RG122     32
RG123     32
RG124     32
RG125     32
RG126     32
RG127     32
RG128     32
RG129     32
RG130     32
RG131     32
RG132     32
RG133     32
RG134     32
RG135     32
RG136     32
RG137     32
RG138     32
RG139     32
RG140     32
RG141     32
RG142     32
RG143     32
RG144     32
RG145     32
RG146     32
RG147     32
RG148     32
RG149     32
RG150     32
RG151     32
RG152     32
RG153     32
RG154     32
RG155     32
RG156     32
RG157     32
RG158     32
RG159     32
RG160     32
RG161     32
RG162     32
RG163     32
RG164     32
RG165     32
RG166     32
RG167     32
RG168     32
RG169     32
RG170     32
RG171     32
RG172     32
RG173     32
RG174     32
RG175     32
RG176     32
RG177     32
RG178     32
RG179     32
RG180     32
RG181     32
RG182     32
RG183     32
RG184     32
RG185     32
RG186     32
RG187     32
RG188     32
RG189     32
RG190     32
RG191     32
RG192     32
RG193     32
RG194     32
RG195     32
RG196     32
RG197     32
RG198     32
RG199     32
RG200     32
RG201     32
RG202     32
RG203     32
RG204     32
RG205     32
RG206     32
RG207     32
RG208     32
RG209     32
RG210     32
RG211     32
RG212     32
RG213     32
RG214     32
RG215     32
RG216     32
RG217     32
RG218     32
RG219     32
RG220     32
RG221     32
RG222     32
RG223     32
RG224     32
RG225     32
RG226     32
RG227     32
RG228     32
RG229     32
RG230     32
RG231     32
RG232     32
RG233     32
RG234     32
RG235     32
RG236     32
RG237     32
RG238     32
RG239     32
RG240     32
RG241     32
RG242     32
RG243     32
RG244     32
RG245     32
RG246     32
RG247     32
RG248     32
RG249     32
RG250     32
RG251     32
RG252     32
RG253     32
RG254     32
RG255     32
RG256     32
RG257     32
RG258     32
RG259     32
RG260     32
RG261     32
RG262     32
RG263     32
RG264     32
RG265     32
RG266     32
RG267     32
RG268     32
RG269     32
RG270     32
RG271     32
RG272     32
RG273     32
RG274     32
RG275     32
RG276     32
RG277     32
RG278     32
RG279     32
RG280     32
RG281     32
RG282     32
RG283     32
RG284     32
RG285     32
RG286     32
RG287     32
RG288     32
RG289     32
RG290     32
RG291     32
RG292     32
RG293     32
RG294     32
RG295     32
RG296     32
RG297     32
RG298     32
RG299     32
RG300     32
RG301     32
RG302     32
RG303     32
RG304     32
RG305     32
RG306     32
RG307     32
RG308     32
RG309     32
RG310     32
RG311     32
RG312     32
RG313     32
RG314     32
RG315     32
RG316     32
RG317     32
RG318     32
RG319     32
RG320     32
RG321     32
RG322     32
RG323     32
RG324     32
RG325     32
RG326     32
RG327     32
RG328     32
RG329     32
RG330     32
RG331     32
RG332     32
RG333     32
RG334     32
RG335     32
RG336     32
RG337     32
RG338     32
RG339     32
RG340     32
RG341     32
RG342     32
RG343     32
RG344     32
RG345     32
RG346     32
RG347     32
RG348     32
RG349     32
RG350     32
RG351     32
RG352     32
RG353     32
RG354     32
RG355     32
RG356     32
RG357     32
RG358     32
RG359     32
RG360     32
RG361     32
RG362     32
RG363     32
RG364     32
RG365     32
RG366     32
RG367     32
RG368     32
RG369     32
RG370     32
RG371     32
RG372     32
RG373     32
RG374     32
RG375     32
RG376     32
RG377     32
RG378     32
RG379     32
RG380     32
RG381     32
RG382     32
RG383     32
RG384     32
RG385     32
RG386     32
RG387     32
RG388     32
RG389     32
RG390     32
RG391     32
RG392     32
RG393     32
RG394     32
RG395     32
RG396     32
RG397     32
RG398     32
RG399     32
RG400     32
RG401     32
RG402     32
RG403     32
RG404     32
RG405     32
RG406     32
RG407     32
RG408     32
RG409     32
RG410     32
RG411     32
RG412     32
RG413     32
RG414     32
RG415     32
RG416     32
RG417     32
RG418     32
RG419     32
RG420     32
RG421     32
RG422     32
RG423     32
RG424     32
RG425     32
RG426     32
RG427     32
RG428     32
RG429     32
RG430     32
RG431     32
RG432     32
RG433     32
RG434     32
RG435     32
RG436     32
RG437     32
RG438     32
RG439     32
RG440     32
RG441     32
RG442     32
RG443     32
RG444     32
RG445     32
RG446     32
RG447     32
RG448     32
RG449     32
RG450     32
RG451     32
RG452     32
RG453     32
RG454     32
RG455     32
RG456     32
RG457     32
RG458     32
RG459     32
RG460     32
RG461     32
RG462     32
RG463     32
RG464     32
RG465     32
RG466     32
RG467     32
RG468     32
RG469     32
RG470     32
RG471     32
RG472     32
RG473     32
RG474     32
RG475     32
RG476     32
RG477     32
RG478     32
RG479     32
RG480     32
RG481     32
RG482     32
RG483     32
RG484     32
RG485     32
RG486     32
RG487     32
RG488     32
RG489     32
RG490     32
RG491     32
RG492     32
RG493     32
RG494     32
RG495     32
RG496     32
RG497     32
RG498     32
RG499     32
RG500     32
RG501     32
RG502     32
RG503     32
RG504     32
RG505     32
RG506     32
RG507     32
RG508     32
RG509     32
RG510     32
RG511     32
RG512     32
RG513     32
RG514     32
RG515     32
RG516     32
RG517     32
RG518     32
RG519     32
RG520     32
RG521     32
RG522     32
RG523     32
RG524     32
RG525     32
RG526     32
RG527     32
RG528     32
RG529     32
RG530     32
RG531     32
RG532     32
RG533     32
RG534     32
RG535     32
RG536     32
RG537     32
RG538     32
RG539     32
RG540     32
RG541     32
RG542     32
RG543     32
RG544     32
RG545     32
RG546     32
RG547     32
RG548     32
RG549     32
RG550     32
RG551     32
RG552     32
RG553     32
RG554     32
RG555     32
RG556     32
RG557     32
RG558     32
RG559     32
RG560     32
RG561     32
RG562     32
RG563     32
RG564     32
RG565     32
RG566     32
RG567     32
RG568     32
RG569     32
RG570     32
RG571     32
RG572     32
RG573     32
RG574     32
RG575     32
RG576     32
RG577     32
RG578     32
RG579     32
RG580     32
RG581     32
RG582     32
RG583     32
RG584     32
RG585     32
RG586     32
RG587     32
RG588     32
RG589     32
RG590     32
RG591     32
RG592     32
RG593     32
RG594     32
RG595     32
RG596     32
RG597     32
RG598     32
RG599     32
RG600     32
RG601     32
RG602     32
RG603     32
RG604     32
RG605     32
RG606     32
RG607     32
RG608     32
RG609     32
RG610     32
RG611     32
RG612     32
RG613     32
RG614     32
RG615     32
RG616     32
RG617     32
RG618     32
RG619     32
RG620     32
RG621     32
RG622     32
RG623     32
RG624     32
RG625     32
RG626     32
RG627     32
RG628     32
RG629     32
RG630     32
RG631     32
RG632     32
RG633     32
RG634     32
RG635     32
RG636     32
RG637     32
RG638     32
RG639     32
RG640     32
RG641     32
RG642     32
RG643     32
RG644     32
RG645     32
RG646     32
RG647     32
RG648     32
RG649     32
RG650     32
RG651     32
RG652     32
RG653     32
RG654     32
RG655     32
RG656     32
RG657     32
RG658     32
RG659     32
RG660     32
RG661     32
RG662     32
RG663     32
RG664     32
RG665     32
RG666     32
RG667     32
RG668     32
RG669     32
RG670     32
RG671     32
RG672     32
RG673     32
RG674     32
RG675     32
RG676     32
RG677     32
RG678     32
RG679     32
RG680     32
RG681     32
RG682     32
RG683     32
RG684     32
RG685     32
RG686     32
RG687     32
RG688     32
RG689     32
RG690     32
RG691     32
RG692     32
RG693     32
RG694     32
RG695     32
RG696     32
RG697     32
RG698     32
RG699     32
RG700     32
RG701     32
RG702     32
RG703     32
RG704     32
RG705     32
RG706     32
RG707     32
RG708     32
RG709     32
RG710     32
RG711     32
RG712     32
RG713     32
RG714     32
RG715     32
RG716     32
RG717     32
RG718     32
RG719     32
RG720     32
RG721     32
RG722     32
RG723     32
RG724     32
RG725     32
RG726     32
RG727     32
RG728     32
RG729     32
RG730     32
RG731     32
RG732     32
RG733     32
RG734     32
RG735     32
RG736     32
RG737     32
RG738     32
RG739     32
RG740     32
RG741     32
RG742     32
RG743     32
RG744     32
RG745     32
RG746     32
RG747     32
RG748     32
RG749     32
RG750     32
RG751     32
RG752     32
RG753     32
RG754     32
RG755     32
RG756     32
RG757     32
RG758     32
RG759     32
RG760     32
RG761     32
RG762     32
RG763     32
RG764     32
RG765     32
RG766     32
RG767     32
RG768     32
RG769     32
RG770     32
RG771     32
RG772     32
RG773     32
RG774     32
RG775     32
RG776     32
RG777     32
RG778     32
RG779     32
RG780     32
RG781     32
RG782     32
RG783     32
RG784     32
RG785     32
RG786     32
RG787     32
RG788     32
RG789     32
RG790     32
RG791     32
RG792     32
RG793     32
RG794     32
RG795     32
RG796     32
RG797     32
RG798     32
RG799     32
RG800     32
RG801     32
RG802     32
RG803     32
RG804     32
RG805     32
RG806     32
RG807     32
RG808     32
RG809     32
RG810     32
RG811     32
RG812     32
RG813     32
RG814     32
RG815     32
RG816     32
RG817     32
RG818     32
RG819     32
RG820     32
RG821     32
RG822     32
RG823     32
RG824     32
RG825     32
RG826     32
RG827     32
RG828     32
RG829     32
RG830     32
RG831     32
RG832     32
RG833     32
RG834     32
RG835     32
RG836     32
RG837     32
RG838     32
RG839     32
RG840     32
RG841     32
RG842     32
RG843     32
RG844     32
RG845     32
RG846     32
RG847     32
RG848     32
RG849     32
RG850     32
RG851     32
RG852     32
RG853     32
RG854     32
RG855     32
RG856     32
RG857     32
RG858     32
RG859     32
RG860     32
RG861     32
RG862     32
RG863     32
RG864     32
RG865     32
RG866     32
RG867     32
RG868     32
RG869     32
RG870     32
RG871     32
RG872     32
RG873     32
RG874     32
RG875     32
RG876     32
RG877     32
RG878     32
RG879     32
RG880     32
RG881     32
RG882     32
RG883     32
RG884     32
RG885     32
RG886     32
RG887     32
RG888     32
RG889     32
RG890     32
RG891     32
RG892     32
RG893     32
RG894     32
RG895     32
RG896     32
RG897     32
RG898     32
RG899     32
RG900     32
RG901     32
RG902     32
RG903     32
RG904     32
RG905     32
RG906     32
RG907     32
RG908     32
RG909     32
RG910     32
RG911     32
RG912     32
RG913     32
RG914     32
RG915     32
RG916     32
RG917     32
RG918     32
RG919     32
RG920     32
RG921     32
RG922     32
RG923     32
RG924     32
RG925     32
RG926     32
RG927     32
RG928     32
RG929     32
RG930     32
RG931     32
RG932     32
RG933     32
RG934     32
RG935     32
RG936     32
RG937     32
RG938     32
RG939     32
RG940     32
RG941     32
RG942     32
RG943     32
RG944     32
RG945     32
RG946     32
RG947     32
RG948     32
RG949     32
RG950     32
RG951     32
RG952     32
RG953     32
RG954     32
RG955     32
RG956     32
RG957     32
RG958     32
RG959     32
RG960     32
RG961     32
RG962     32
RG963     32
RG964     32
RG965     32
RG966     32
RG967     32
RG968     32
RG969     32
RG970     32
RG971     32
RG972     32
RG973     32
RG974     32
RG975     32
RG976     32
RG977     32
RG978     32
RG979     32
RG980     32
RG981     32
RG982     32
RG983     32
RG984     32
RG985     32
RG986     32
RG987     32
RG988     32
RG989     32
RG990     32
RG991     32
RG992     32
RG993     32
RG994     32
RG995     32
RG996     32
RG997     32
RG998     32
RG999     32
RG1000    32

```

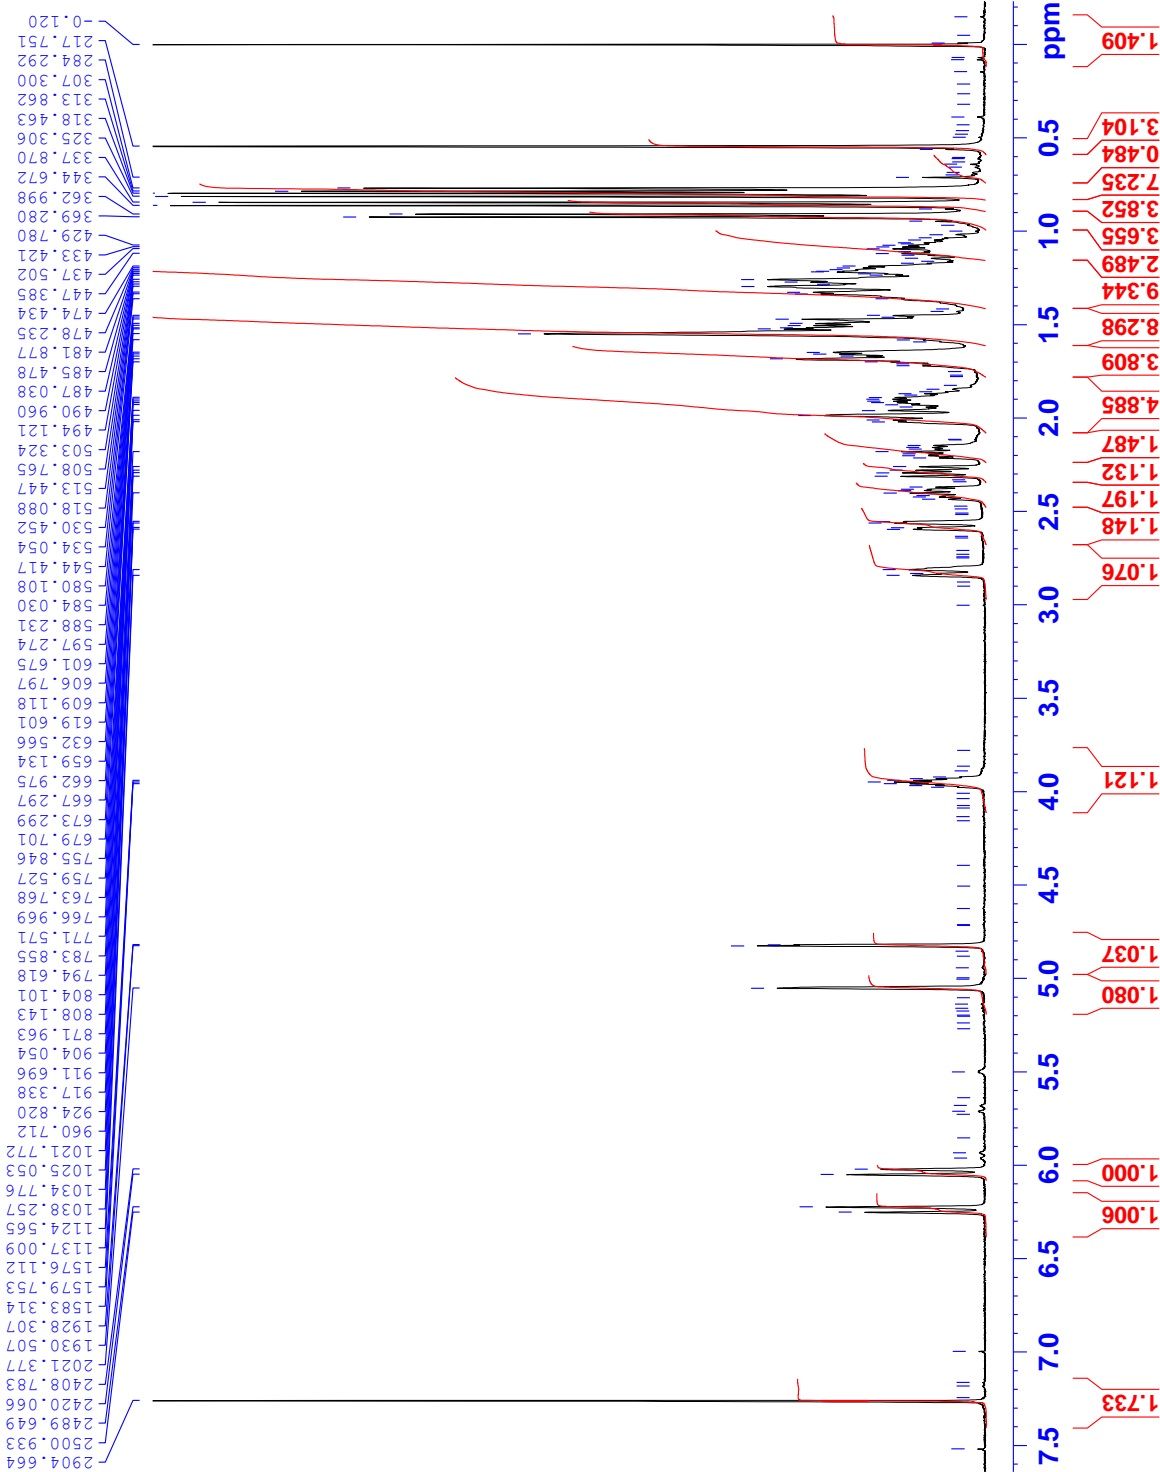

Figure S22. <sup>1</sup>H NMR spectrum of vitamin D<sub>7</sub> (7).



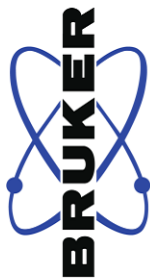

Current Data Parameters  
 NAME ak65-86-2  
 EXPNO 11  
 PROCNO 1

F2 - Acquisition Parameters  
 Date\_ 20180308  
 Time 11:30

INSTRUM spect  
 PROBRD 5 mm CPBBO BB-  
 PULPROG cosygphf

TD 2048  
 SOLVENT CDCl3  
 NS 1  
 DS 8

SWH 5341.880 Hz  
 FIDRES 2.608340 Hz  
 AQ 0.1916928 sec

RG 256  
 DM 93.600 usec  
 DE 6.50 usec

TE 300.0 K  
 DT 0.0008199 sec  
 D1 1.48689198 sec

D13 0.0000400 sec  
 D16 0.0002000 sec  
 ENO 0.00018720 sec

==== CHANNEL f1 =====  
 NUCL1 1H  
 P0 12.00 usec  
 P1 12.00 usec

PL1 -3.60 dB  
 PL1W 21.29127693 W  
 SFO1 400.1324057 MHz

==== GRADIENT CHANNEL =====  
 SPINAM11 SINE.100  
 SFO21 10.00 %  
 P16 1000.00 usec

F1 - Acquisition Parameters  
 TD 1024  
 SFO1 400.1324 MHz  
 FIDRES 41.733440 Hz

SW 13.350 ppm  
 F0CODE Qf

F2 - Processing parameters  
 SI 1024  
 SF 400.1300033 MHz  
 SINE

SSB 0  
 GB 0 Hz  
 SB 0

PC 1.40

F1 - Processing parameters  
 SI 1024  
 SF 400.1300033 MHz  
 SINE

SSB 0  
 GB 0 Hz  
 SB 0

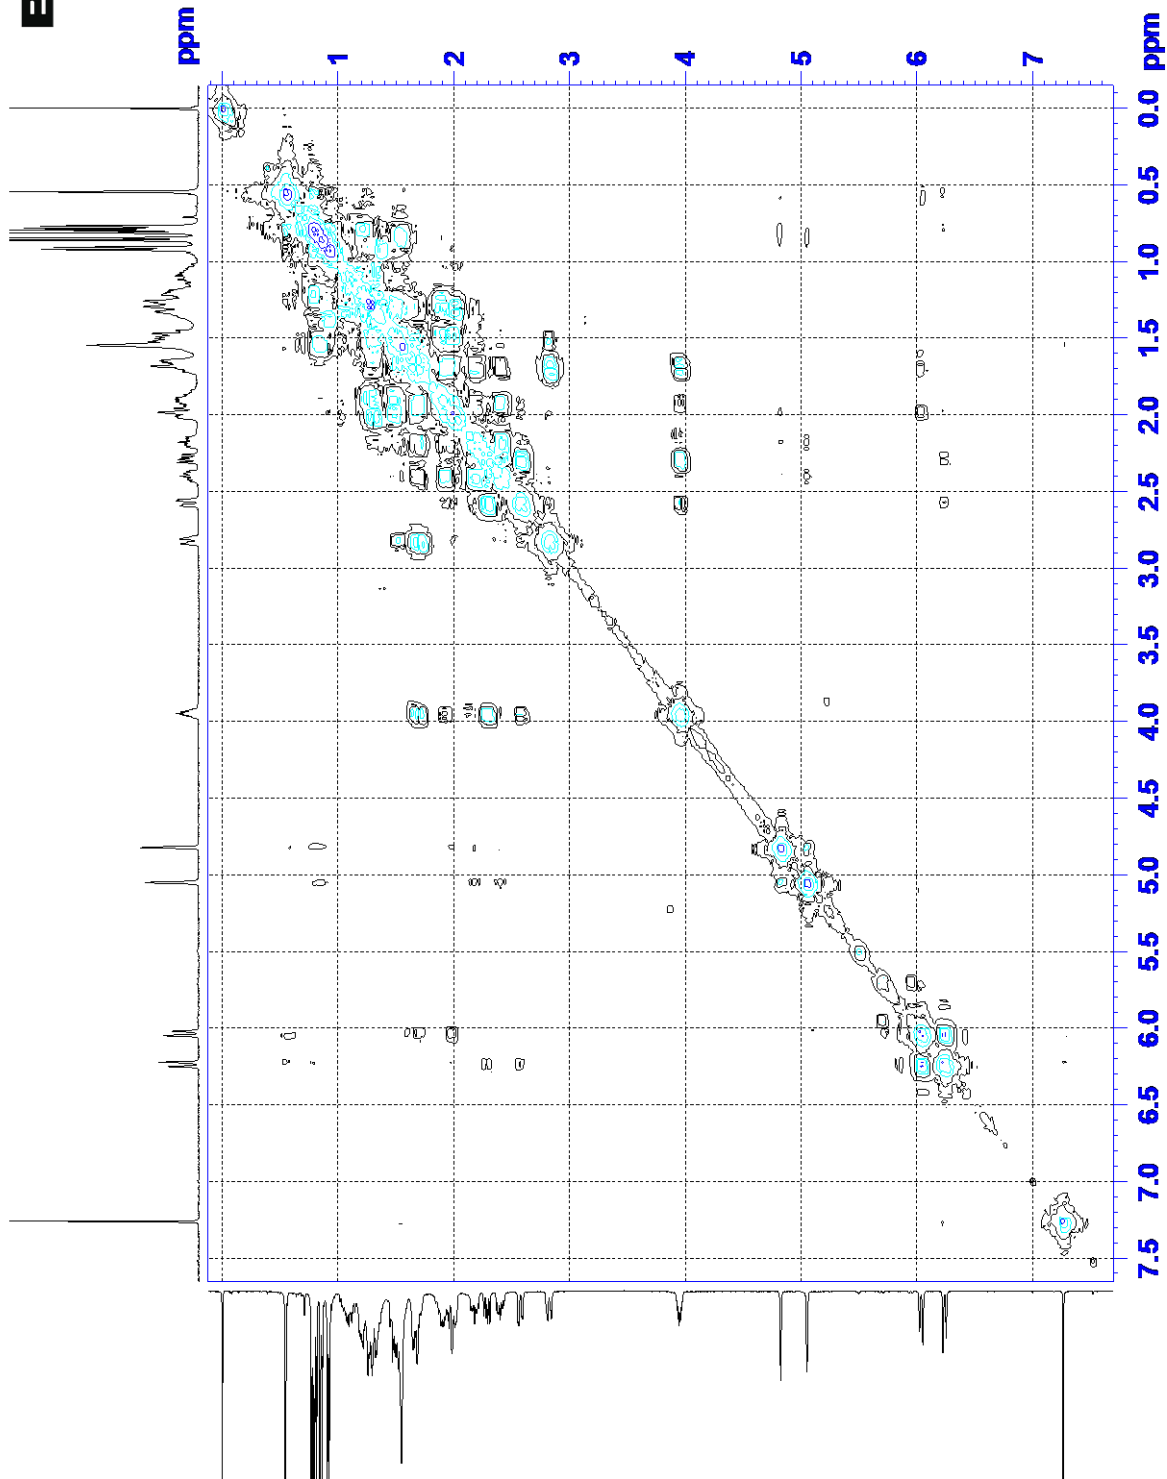

Figure S23. <sup>1</sup>H COSY NMR spectrum of vitamin D<sub>7</sub> (7).

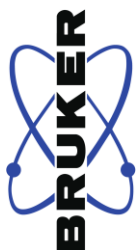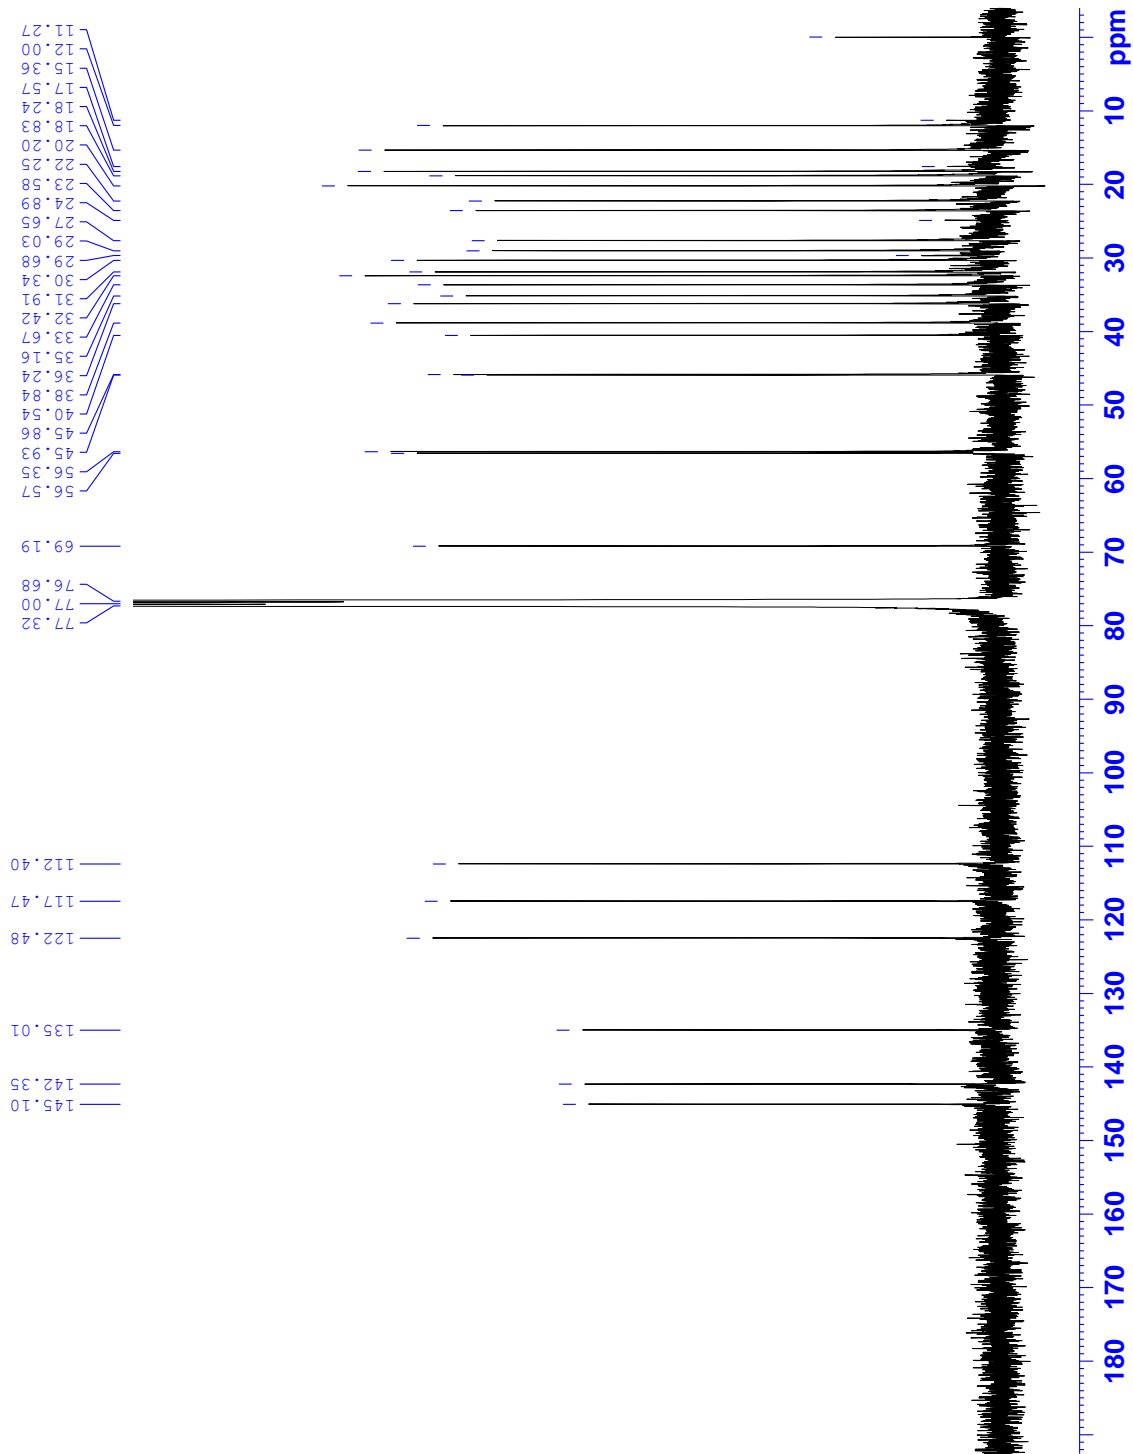

Figure S24. <sup>13</sup>C NMR spectrum of vitamin D<sub>7</sub> (7).

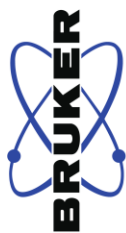

Current Data Parameters  
Date\_ 20180308  
Time\_ 12.55

F2 - Acquisition Parameters  
Date\_ 20180308  
Time\_ 12.55

INSTRUM spect  
PROBHD 5 mm CPBPRG  
PULPROG zgpg30  
TD 4096  
SOLVENT CDCl3  
NS 8  
DS 16  
SWH 5341.880 Hz  
FIDRES 1.304170 Hz  
RG 6534  
AQ 0.394516 sec  
RG 4634  
DW 93.600 nsec  
DE 6.50 nsec  
TE 300.0 K  
CST13 8.0000000  
DD 0.0000300 sec  
DL 1.5000000 sec  
DLE 0.0000000 sec  
D16 0.0002000 sec  
180 0.00002233 sec

==== CHANNEL F1 =====  
NUC1 1H  
P1 12.00 usec  
PC 12.00 usec  
PL1 -3.50 dB  
PL2 -3.50 dB  
PL1W 21.29127693 W  
SFO1 400.1324057 MHz

==== CHANNEL F2 =====  
NUC2 13C  
P3 10.00 usec  
PC 10.00 usec  
PL3 0.00 dB  
PL4 0.00 dB  
PL3W 89.24255003 W  
SFO2 100.6288138 MHz

==== GRADIENT CHANNEL =====  
GPM1(1) SINE.100  
GPM1(2) SINE.100  
GPM1(3) SINE.100  
SP 30.00 %  
SP2 30.00 %  
SP3 30.00 %  
GZ23 40.10 %  
PL6 1000.00 nsec

F1 - Acquisition parameters  
TD 128  
SFO1 100.6228 MHz  
SFO2 177.25242 Hz  
SFO3 222.092 Ppm  
PMODE OP

F2 - Processing parameters  
SI 1024  
SF 400.1300000 MHz  
WDW 0  
SSB 0  
GB 0 Hz  
PC 1.40

F1 - Processing parameters  
SI 1024  
SF 100.627690 MHz  
WDW 0  
SSB 0  
GB 0 Hz

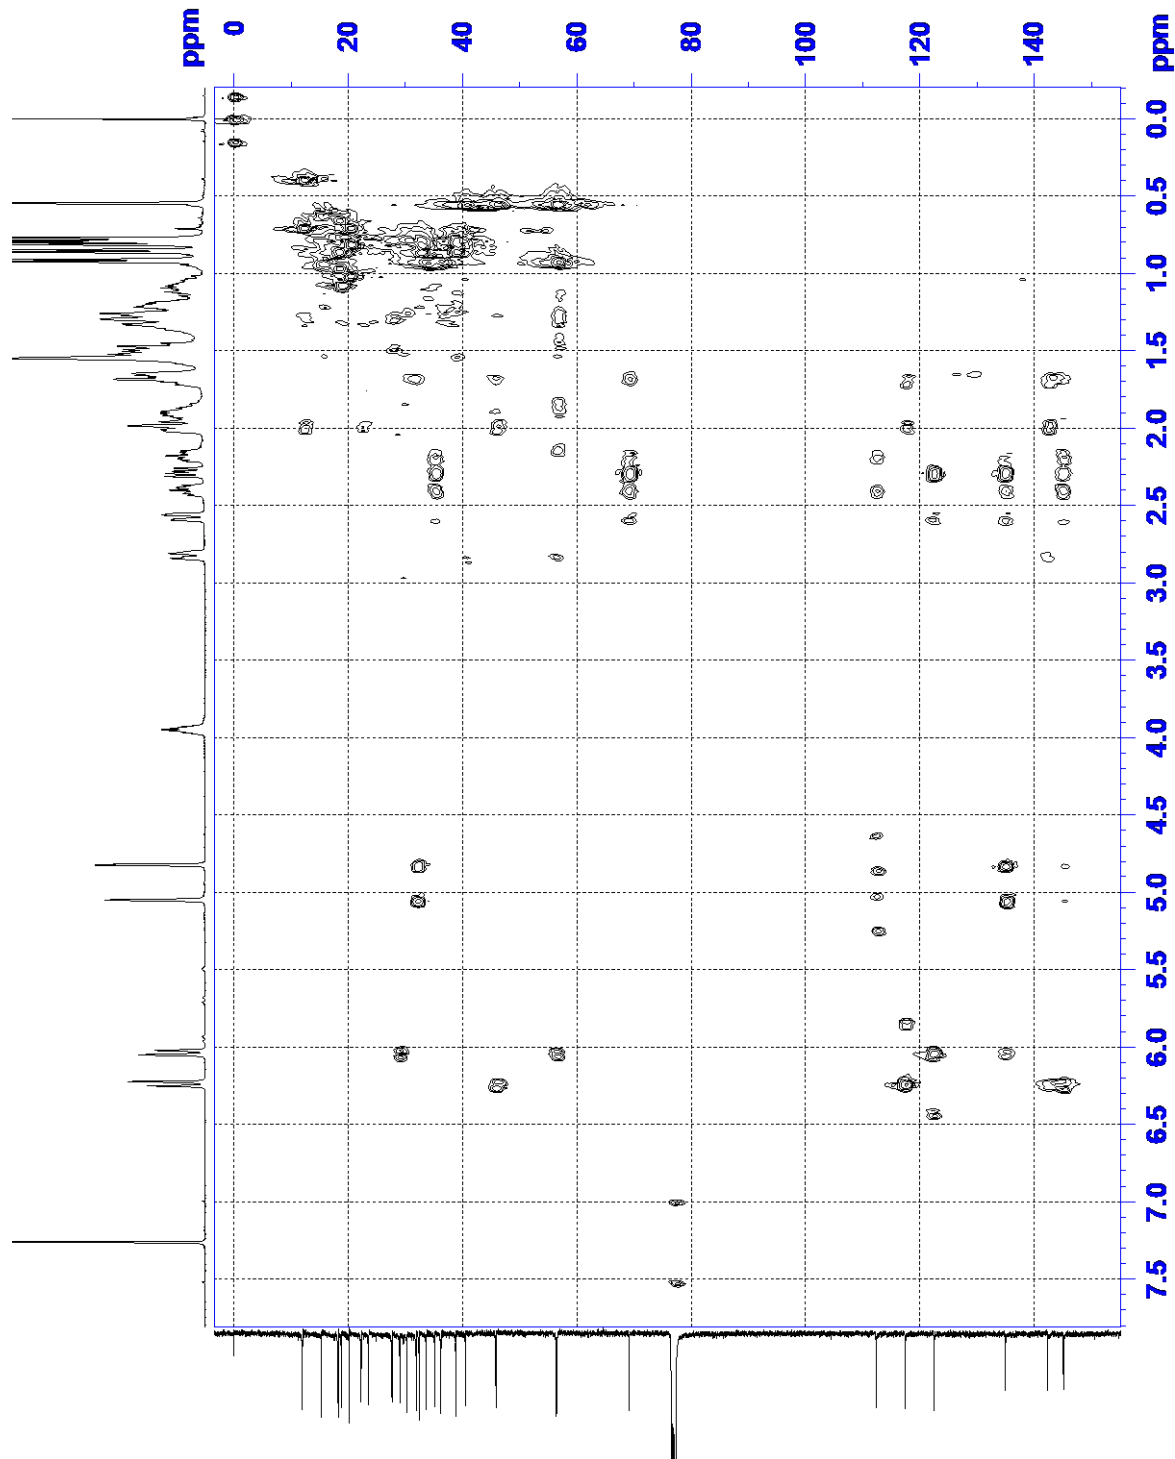

Figure S25. HMBC NMR spectrum of vitamin D<sub>7</sub> (7).
